# Supplementary material for: MiFish, a set of universal PCR primers for metabarcoding environmental DNA from fishes: detection of more than 230 subtropical marine species
Source: PubMed Central journal article supplement (PMC4632578; doi:10.1098/rsos.150088), 2015-07-22
Supplement: rsos150088supp1.pdf [file rsos150088supp1.pdf]

## Contents of the electronic supplementary material

|                                                                                                                                                                                                                 |    |
|-----------------------------------------------------------------------------------------------------------------------------------------------------------------------------------------------------------------|----|
| Table S1. A list of fish species used for designing universal primers (MiFish-U) including 880 species placed in 51 orders, 242 families and 623 genera. ....                                                   | 1  |
| Table S2. A list of fish species used for designing universal primers specifically designed for elasmobranchs (MiFish-E) including 160 species placed in 12 orders, 39 families and 77 genera. ....             | 18 |
| Table S3. A list of fish species used for constructing the custom database for taxonomic assignment using BLAST including 648 sequences from 594 species placed in 36 orders, 162 families and 390 genera. .... | 21 |

Table S1.

A list of fish species used for designing universal primers (MiFish-U) including 880 species placed in 51 orders, 242 families and 623 genera.

| Order             | Family           | Species                               | Accession No. |
|-------------------|------------------|---------------------------------------|---------------|
| Chimaeriformes    | Callorhynchidae  | <i>Callorhynchus callorynchus</i>     | HM147135      |
|                   |                  | <i>Callorhynchus capensis</i>         | HM147136      |
|                   |                  | <i>Callorhynchus milii</i>            | HM147137      |
|                   | Rhinochimaeridae | <i>Harriotta raleighana</i>           | HM147140      |
|                   | Chimaeridae      | <i>Chimaera fulva</i>                 | HM147138      |
|                   |                  | <i>Chimaera monstrosa</i>             | AJ310140      |
| Heterodontiformes | Heterodontidae   | <i>Heterodontus francisci</i>         | AJ310141      |
| Orectolobiformes  | Hemiscylliidae   | <i>Chiloscyllium griseum</i>          | JQ434458      |
|                   |                  | <i>Chiloscyllium plagiosum</i>        | FJ853422      |
|                   |                  | <i>Chiloscyllium punctatum</i>        | JQ082337      |
| Lamniformes       | Mitsukurinidae   | <i>Mitsukurina owstoni</i>            | EU528659      |
| Carchariniformes  | Scyliorhinidae   | <i>Scyliorhinus canicula</i>          | Y16067        |
|                   | Triakidae        | <i>Mustelus manazo</i>                | AB015962      |
|                   | Carcharhinidae   | <i>Scoliodon laticaudus</i>           | JQ693102      |
| Squaliformes      | Squalidae        | <i>Squalus acanthias</i>              | Y18134        |
| Rajiformes        | Rajidae          | <i>Amblyraja radiata</i>              | AF106038      |
|                   |                  | <i>Leucoraja erinacea</i>             | JQ034406      |
|                   |                  | <i>Okamejei kenojei</i>               | AY525783      |
|                   |                  | <i>Plesiobatis daviesi</i>            | AY597334      |
| Myliobatiformes   | Hexatrygonidae   | <i>Plesiobatis daviesi</i>            | AY597334      |
| Polypteriformes   | Polypteridae     | <i>Polypterus ornatipinnis</i>        | U62532        |
|                   |                  | <i>Polypterus senegalus senegalus</i> | AP004352      |
|                   |                  | <i>Acipenser baerii</i>               | JQ045341      |
| Acipenseriformes  | Acipenseridae    | <i>Acipenser dabryanus</i>            | AY510085      |
|                   |                  | <i>Acipenser gueldenstaedtii</i>      | FJ392605      |
|                   |                  | <i>Acipenser sinensis</i>             | EU719645      |
|                   |                  | <i>Acipenser stellatus</i>            | AJ585050      |
|                   |                  | <i>Acipenser transmontanus</i>        | AB042837      |
|                   |                  | <i>Scaphirhynchus cf. albus</i>       | AP004354      |
|                   |                  | <i>Polyodon spathula</i>              | AP004353      |
|                   |                  | <i>Psephurus gladius</i>              | AY571339      |
|                   |                  | <i>Atractosteus spatula</i>           | AP004355      |
|                   |                  | <i>Lepisosteus oculatus</i>           | AB042861      |
|                   |                  | <i>Lepisosteus osseus</i>             | DQ536423      |
|                   |                  | <i>Amia calva</i>                     | AB042952      |
| Amiiformes        | Amiidae          | <i>Amia calva</i>                     | AB042952      |
| Hiodontiformes    | Hiodontidae      | <i>Hiodon alosoides</i>               | AP004356      |
|                   |                  | <i>Hiodon tergisus</i>                | AP009499      |
|                   |                  | <i>Arapaima gigas</i>                 | EF523611      |
| Osteoglossiformes | Osteoglossidae   | <i>Heterotis niloticus</i>            | AP009498      |
|                   |                  | <i>Osteoglossum bicirrhosum</i>       | AB043025      |
|                   |                  | <i>Pantodon buchholzi</i>             | AB043068      |
|                   |                  | <i>Scleropages formosus</i>           | DQ023143      |
|                   |                  | <i>Chitala blanci</i>                 | AP008921      |
|                   |                  | <i>Chitala lopis</i>                  | AP008922      |
|                   |                  | <i>Chitala ornata</i>                 | AP008923      |
|                   |                  | <i>Notopterus notopterus</i>          | AP008924      |
|                   |                  | <i>Papyrocranus congoensis</i>        | AP008926      |
|                   |                  | <i>Xenomystus nigri</i>               | AP008927      |
|                   |                  | <i>Brienomyrus niger</i>              | AP008929      |
|                   |                  | <i>Genyomyrus donnyi</i>              | AP009500      |
|                   |                  | <i>Gnathonemus petersii</i>           | AP008928      |
|                   |                  | <i>Gymnarchus niloticus</i>           | AP008930      |
|                   |                  |                                       | Mormyridae    |

|                |                   |                                                        |          |
|----------------|-------------------|--------------------------------------------------------|----------|
|                |                   | <i>Marcusenius senegalensis</i>                        | AP011575 |
|                |                   | <i>Myomyrus macrops</i>                                | AP009501 |
|                |                   | <i>Paramormyrops gabonensis</i>                        | AP009614 |
|                |                   | <i>Petrocephalus soudanensis</i>                       | AP009502 |
| Elopiformes    | Elopidae          | <i>Elops hawaiiensis</i>                               | AB051070 |
|                |                   | <i>Elops saurus</i>                                    | AP004807 |
|                | Megalopidae       | <i>Megalops atlanticus</i>                             | AP004808 |
|                |                   | <i>Megalops cyprinoides</i>                            | AB051110 |
| Albuliformes   | Albulidae         | <i>Albula glossodonta</i>                              | AP002973 |
|                |                   | <i>Pterothrissus gissu</i>                             | AB051197 |
|                | Halosauridae      | <i>Aldrovandia affinis</i>                             | AP002974 |
|                | Notacanthidae     | <i>Notacanthus chemnitzii</i>                          | AP002975 |
| Anguilliformes | Anguillidae       | <i>Anguilla anguilla</i>                               | AP007233 |
|                |                   | <i>Anguilla australis australis</i>                    | AP007234 |
|                |                   | <i>Anguilla australis schmidtii</i>                    | AP007235 |
|                |                   | <i>Anguilla bengalensis labiata</i>                    | AP007245 |
|                |                   | <i>Anguilla bicolor bicolor</i>                        | AP007236 |
|                |                   | <i>Anguilla bicolor pacifica</i>                       | AP007237 |
|                |                   | <i>Anguilla dieffenbachii</i>                          | AP007240 |
|                |                   | <i>Anguilla interioris</i>                             | AP007241 |
|                |                   | <i>Anguilla japonica</i>                               | AB038556 |
|                |                   | <i>Anguilla luzonensis</i>                             | AB469437 |
|                |                   | <i>Anguilla malgumora</i>                              | AP007238 |
|                |                   | <i>Anguilla marmorata</i>                              | AP007242 |
|                |                   | <i>Anguilla megastoma</i>                              | AP007243 |
|                |                   | <i>Anguilla mossambica</i>                             | AP007244 |
|                |                   | <i>Anguilla nebulosa nebulosa</i>                      | AP007246 |
|                |                   | <i>Anguilla obscura</i>                                | AP007247 |
|                |                   | <i>Anguilla reinhardtii</i>                            | AP007248 |
|                |                   | <i>Anguilla rostrata</i>                               | AP007249 |
|                |                   | <i>Anguilla</i> sp. HYT-2008                           | AB469437 |
|                | Heterenchelyidae  | <i>Pythonichthys microphthalmus</i>                    | AP010842 |
|                | Moringuidae       | <i>Moringua edwardsi</i>                               | AP010840 |
|                |                   | <i>Moringua microchir</i>                              | AP010841 |
|                | Chlopsidae        | <i>Kaupichthys hyoprорoides</i>                        | AP010845 |
|                |                   | <i>Robinsia catherinae</i>                             | AP010846 |
|                |                   | <i>Thalassenchelys</i> sp. Tht2                        | AP010867 |
|                | Myrocongridae     | <i>Myroconger compressus</i>                           | AP010847 |
|                | Muraenidae        | <i>Anarchias</i> sp. Ansp                              | AP010843 |
|                |                   | <i>Gymnothorax kidako</i>                              | AP002976 |
|                |                   | <i>Rhinomuraena quaesita</i>                           | AP010844 |
|                | Synaphobranchidae | <i>Ilyophis brunneus</i>                               | AP010848 |
|                |                   | <i>Simenchelys parasitica</i>                          | AP010849 |
|                |                   | <i>Synaphobranchus kaupii</i>                          | AP002977 |
|                | Ophichthidae      | <i>Myrichthys maculosus</i>                            | AP010862 |
|                | Colocongridae     | <i>Coloconger cadenati</i>                             | AP010863 |
|                | Derichthyidae     | <i>Derichthys serpentinus</i>                          | AP010851 |
|                |                   | <i>Nessorhamphus ingolfianus</i>                       | AP010850 |
|                | Muraenesocidae    | <i>Cynoponticus ferox</i>                              | AP010853 |
|                |                   | <i>Muraenesox bagio</i>                                | AP010852 |
|                | Nemichthyidae     | <i>Avocettina infans</i>                               | AP010855 |
|                |                   | <i>Labichthys carinatus</i>                            | AP010856 |
|                |                   | <i>Nemichthys scolopaceus</i>                          | AP010854 |
|                | Congridae         | <i>Heteroconger hassi</i>                              | AP010859 |
|                |                   | <i>Leptocephalus</i> sp. 'type II larva' (Smith, 1989) | AP010868 |
|                |                   | <i>Paraconger notialis</i>                             | AP010860 |
|                | Nettastomatidae   | <i>Facciolella oxyrhyncha</i>                          | AP010866 |

|              |                  |                                    |          |
|--------------|------------------|------------------------------------|----------|
|              |                  | <i>Hoplunnis punctata</i>          | AP010865 |
|              |                  | <i>Nettastoma parviceps</i>        | AP010864 |
|              | Serrivomeridae   | <i>Serrivomer beanii</i>           | AP010857 |
|              |                  | <i>Serrivomer sector</i>           | AP007250 |
| Clupeiformes | Denticipitidae   | <i>Denticeps clupeoides</i>        | AP007276 |
|              | Pristigasteridae | <i>Pellona flavipinnis</i>         | AP009619 |
|              | Engraulidae      | <i>Amazonsprattus scintilla</i>    | AP009617 |
|              |                  | <i>Anchoviella</i> sp. LBP 2297    | AP011557 |
|              |                  | <i>Coilia lindmani</i>             | AP011558 |
|              |                  | <i>Coilia nasus</i>                | AP009135 |
|              |                  | <i>Coilia reynaldi</i>             | AP011559 |
|              |                  | <i>Engraulis encrasicolus</i>      | AP009137 |
|              |                  | <i>Engraulis japonicus</i>         | AB040676 |
|              |                  | <i>Lycengraulis grossidens</i>     | AP011563 |
|              |                  | <i>Lycothrissa crocodilus</i>      | AP011562 |
|              |                  | <i>Thryssa baelama</i>             | AP009616 |
|              | Chirocentridae   | <i>Chirocentrus dorab</i>          | AP006229 |
|              | Clupeidae        | <i>Alosa alosa</i>                 | AP009131 |
|              |                  | <i>Alosa pseudoharengus</i>        | AP009132 |
|              |                  | <i>Alosa sapidissima</i>           | HQ331537 |
|              |                  | <i>Brevoortia tyrannus</i>         | AP009618 |
|              |                  | <i>Clupea harengus</i>             | AP009133 |
|              |                  | <i>Clupea pallasii</i>             | AP009134 |
|              |                  | <i>Clupeichthys aesarnensis</i>    | AP011584 |
|              |                  | <i>Clupeichthys goniognathus</i>   | AP011589 |
|              |                  | <i>Clupeichthys perakensis</i>     | AP011585 |
|              |                  | <i>Clupeoides borneensis</i>       | AP011586 |
|              |                  | <i>Clupeoides</i> sp. Chao Phraya  | AP011587 |
|              |                  | <i>Clupeonella cultriventris</i>   | AP009615 |
|              |                  | <i>Dorosoma cepedianum</i>         | DQ536426 |
|              |                  | <i>Dorosoma petenense</i>          | AP009136 |
|              |                  | <i>Ehirava fluviatilis</i>         | AP011588 |
|              |                  | <i>Escualosa thoracata</i>         | AP011601 |
|              |                  | <i>Ethmalosa fimbriata</i>         | AP009138 |
|              |                  | <i>Ethmidium maculatum</i>         | AP011602 |
|              |                  | <i>Etrumeus micropus</i>           | AP009139 |
|              |                  | <i>Gudusia chapra</i>              | AP011603 |
|              |                  | <i>Harengula jaguana</i>           | AP011592 |
|              |                  | <i>Hyperlophus vittatus</i>        | AP011593 |
|              |                  | <i>Ilisha africana</i>             | AP009140 |
|              |                  | <i>Ilisha elongata</i>             | AP009141 |
|              |                  | <i>Jenkinsia lamprotaenia</i>      | AP006230 |
|              |                  | <i>Konosirus punctatus</i>         | AP011612 |
|              |                  | <i>Microthrissa congica</i>        | AP011598 |
|              |                  | <i>Microthrissa royauxi</i>        | AP011596 |
|              |                  | <i>Myleus</i> sp. NM-2010          | AP011997 |
|              |                  | <i>Nematalosa japonica</i>         | AP009142 |
|              |                  | <i>Odaxothrissa losera</i>         | AP011595 |
|              |                  | <i>Odaxothrissa vittata</i>        | AP009231 |
|              |                  | <i>Pellonula leonensis</i>         | AP009232 |
|              |                  | <i>Potamalosa richmondia</i>       | AP011594 |
|              |                  | <i>Potamothrissa acutirostris</i>  | AP011597 |
|              |                  | <i>Potamothrissa obtusirostris</i> | AP011599 |
|              |                  | <i>Sardina pilchardus</i>          | AP009233 |
|              |                  | <i>Sardinella albella</i>          | AP011605 |
|              |                  | <i>Sardinella maderensis</i>       | AP009143 |
|              |                  | <i>Sardinops melanostictus</i>     | AB032554 |

|                  |               |                                              |          |
|------------------|---------------|----------------------------------------------|----------|
|                  |               | <i>Spratelloides delicatulus</i>             | AP009144 |
|                  |               | <i>Spratelloides gracilis</i>                | AP009145 |
|                  |               | <i>Sprattus antipodum</i>                    | AP011608 |
|                  |               | <i>Sprattus muelleri</i>                     | AP011607 |
|                  |               | <i>Sprattus sprattus</i>                     | AP009234 |
|                  |               | <i>Sundasalanx mekongensis</i>               | AP006232 |
|                  |               | <i>Sundasalanx praecox</i>                   | AP011590 |
|                  |               | <i>Sundasalanx</i> sp. Chao Phraya           | AP011591 |
|                  |               | <i>Tenualosa ilisha</i>                      | AP011610 |
|                  |               | <i>Tenualosa thibaudeaui</i>                 | AP011604 |
|                  |               | <i>Tenualosa toli</i>                        | AP011600 |
| Gonorynchiformes | Chanidae      | <i>Chanos chanos</i>                         | AB054133 |
|                  | Gonorynchidae | <i>Gonorynchus abbreviatus</i>               | AP009402 |
|                  |               | <i>Gonorynchus greyi</i>                     | AB054134 |
|                  | Kneriidae     | <i>Cromeria nilotica</i>                     | AP007275 |
|                  |               | <i>Grasseichthys gabonensis</i>              | AP007277 |
|                  |               | <i>Kneria</i> sp. SL-2004                    | AP007278 |
|                  |               | <i>Parakneria cameronensis</i>               | AP007279 |
|                  |               | <i>Phractolaemus ansorgii</i>                | AP007280 |
| Cypriniformes    | Cyprinidae    | <i>Acheilognathus intermedia</i>             | EF483933 |
|                  |               | <i>Acheilognathus koreensis</i>              | EF483932 |
|                  |               | <i>Acheilognathus macropterus</i>            | EF483935 |
|                  |               | <i>Acheilognathus signifer</i>               | EF483930 |
|                  |               | <i>Acheilognathus somjinensis</i>            | FJ515921 |
|                  |               | <i>Acheilognathus typus</i>                  | AB239602 |
|                  |               | <i>Acheilognathus yamatsutae</i>             | EF483936 |
|                  |               | <i>Alburnus alburnus</i>                     | AB239593 |
|                  |               | <i>Aphyocypris chinensis</i>                 | AB218688 |
|                  |               | <i>Barbonymus gonionotus</i>                 | AB238966 |
|                  |               | <i>Barbus barbuis</i>                        | AB238965 |
|                  |               | <i>Barbus trimaculatus</i>                   | AB239600 |
|                  |               | <i>Barilius bendelisis</i>                   | AP011433 |
|                  |               | <i>Biwia zezera</i>                          | AB250107 |
|                  |               | <i>Cabdio morar</i>                          | AP011335 |
|                  |               | <i>Campostoma anomalum</i>                   | DQ536421 |
|                  |               | <i>Carassius auratus</i>                     | AB006953 |
|                  |               | <i>Carassius auratus auratus</i>             | AB111951 |
|                  |               | <i>Carassius auratus</i> sp. 'Pingxiang'     | HQ875340 |
|                  |               | <i>Carassius carassius</i>                   | AY714387 |
|                  |               | <i>Carassius cuvieri</i>                     | AB045144 |
|                  |               | <i>Carassius gibelio</i>                     | GU170401 |
|                  |               | <i>Catla catla</i>                           | JQ087872 |
|                  |               | <i>Chanodichthys mongolicus</i>              | AP009060 |
|                  |               | <i>Chondrostoma lemmingii</i>                | DQ536427 |
|                  |               | <i>Cirrhinus mrigala</i>                     | JQ231112 |
|                  |               | <i>Coreoleuciscus splendidus</i>             | DQ347951 |
|                  |               | <i>Ctenopharyngodon idella</i>               | EU391390 |
|                  |               | <i>Culter alburnus</i>                       | GU190362 |
|                  |               | <i>Cyprinella lutrensis</i>                  | AB070206 |
|                  |               | <i>Cyprinella spiloptera</i>                 | DQ536422 |
|                  |               | <i>Cyprinus carpio</i>                       | X61010   |
|                  |               | <i>Cyprinus carpio carpio</i>                | JN105352 |
|                  |               | <i>Cyprinus carpio haematopterus</i>         | JN105354 |
|                  |               | <i>Cyprinus carpio wuyuanensis</i>           | JN105357 |
|                  |               | <i>Cyprinus carpio wuyuanensis x auratus</i> | JN105356 |
|                  |               | <i>Cyprinus carpio xingguonensis</i>         | JN105353 |
|                  |               | <i>Danio dangila</i>                         | AP011235 |

|                                          |          |
|------------------------------------------|----------|
| <i>Danio rerio</i>                       | AC024175 |
| <i>Distoechodon tumirostris</i>          | DQ026431 |
| <i>Esomus metallicus</i>                 | AB239594 |
| <i>Gila conspersa</i>                    | AP009315 |
| <i>Gila robusta</i>                      | DQ536424 |
| <i>Gnathopogon elongatus</i>             | AB218687 |
| <i>Gobio gobio</i>                       | AB239596 |
| <i>Gobiobotia brevibarba</i>             | FJ515919 |
| <i>Gobiobotia macrocephala</i>           | FJ515918 |
| <i>Gobiocypris rarus</i>                 | JN116719 |
| <i>Gymnocypris przewalskii</i>           | AB239595 |
| <i>Hemibarbus barbuis</i>                | AB070241 |
| <i>Hemibarbus labeo</i>                  | DQ347953 |
| <i>Hemibarbus longirostris</i>           | DQ347952 |
| <i>Hemibarbus mylodon</i>                | DQ345787 |
| <i>Hemigrammocypripis rasborella</i>     | AP011422 |
| <i>Hypophthalmichthys molitrix</i>       | EU315941 |
| <i>Hypophthalmichthys nobilis</i>        | EU343733 |
| <i>Ischikauia steenackeri</i>            | AB239601 |
| <i>Labeo bata</i>                        | AP011198 |
| <i>Labeo batesii</i>                     | AB238967 |
| <i>Labeo calbasu</i>                     | JQ231113 |
| <i>Labeo rohita</i>                      | JQ231111 |
| <i>Labeo senegalensis</i>                | AB238968 |
| <i>Leptobarbus hoevenii</i>              | AP011286 |
| <i>Luciosoma bleekeri</i>                | AP011399 |
| <i>Macrochirichthys macrochirus</i>      | AP011234 |
| <i>Megalobrama amblycephala</i>          | EU434747 |
| <i>Microdevario nana</i>                 | AP011402 |
| <i>Microphysogobio koreensis</i>         | FJ515920 |
| <i>Mylocheilus caurinus</i>              | AP010779 |
| <i>Mylopharyngodon piceus</i>            | EU979305 |
| <i>Nicholsicypris normalis</i>           | AP011396 |
| <i>Notemigonus crysoleucas</i>           | AB127393 |
| <i>Notropis stramineus</i>               | DQ536429 |
| <i>Onychostoma lini</i>                  | JQ343982 |
| <i>Opsariichthys bidens</i>              | DQ367044 |
| <i>Opsariichthys uncirostris</i>         | AB218897 |
| <i>Paralaubuca typus</i>                 | AP011211 |
| <i>Pelecus cultratus</i>                 | AB239597 |
| <i>Phenacobius mirabilis</i>             | DQ536431 |
| <i>Phoxinus eos</i>                      | AP009151 |
| <i>Phoxinus percunurus</i>               | AP009149 |
| <i>Phoxinus percunurus mantschuricus</i> | AP009061 |
| <i>Phoxinus percunurus sachalinensis</i> | AP009150 |
| <i>Phoxinus steindachneri</i>            | AP009148 |
| <i>Procypris rabaudi</i>                 | EU082030 |
| <i>Pseudaspius leptocephalus</i>         | AP009058 |
| <i>Pseudogobio esocinus</i>              | AP009310 |
| <i>Pseudopungtungia nigra</i>            | EU597300 |
| <i>Pseudopungtungia tenuicorpus</i>      | FJ515917 |
| <i>Pseudorasbora parva</i>               | JF802126 |
| <i>Pseudorasbora pumila</i>              | AB239599 |
| <i>Pungtungia herzi</i>                  | AB239598 |
| <i>Puntius tetrazona</i>                 | EU287909 |
| <i>Puntius ticto</i>                     | AB238969 |
| <i>Raiamas guttatus</i>                  | AP011222 |

|               |                  |                                                 |          |
|---------------|------------------|-------------------------------------------------|----------|
|               |                  | <i>Raiamas senegalensis</i>                     | AP010780 |
|               |                  | <i>Rasbora daniconius</i>                       | AP011285 |
|               |                  | <i>Rasbora vaterifloris</i>                     | AP011432 |
|               |                  | <i>Rhodeus ocellatus</i>                        | DQ026430 |
|               |                  | <i>Rhodeus ocellatus kurumeus</i>               | AB070205 |
|               |                  | <i>Rhynchocypris lagowskii</i>                  | AP009147 |
|               |                  | <i>Salmostoma bacaila</i>                       | AP011223 |
|               |                  | <i>Sarcocheilichthys variegatus microoculus</i> | AB054124 |
|               |                  | <i>Schizothorax biddulphi</i>                   | JQ844133 |
|               |                  | <i>Sinocyclocheilus altishoulderus</i>          | FJ984568 |
|               |                  | <i>Sinocyclocheilus grahami</i>                 | GQ148557 |
|               |                  | <i>Tanichthys albonubes</i>                     | AP011397 |
|               |                  | <i>Tinca tinca</i>                              | AB218686 |
|               |                  | <i>Tribolodon nakamurai</i>                     | AB218896 |
|               |                  | <i>Trigonostigma espei</i>                      | AP011449 |
|               |                  | <i>Xenocypris argentea</i>                      | AP009059 |
|               |                  | <i>Xenocypris davidi</i>                        | GQ289558 |
|               |                  | <i>Yaoshanicus arcus</i>                        | AP011398 |
|               |                  | <i>Zacco sieboldii</i>                          | AB218898 |
|               | Psilorhynchidae  | <i>Psilorhynchus homaloptera</i>                | DQ026436 |
|               |                  | <i>Psilorhynchus sucatio</i>                    | AP011288 |
|               | Gyrinocheilidae  | <i>Gyrinocheilus aymonieri</i>                  | AB242164 |
|               | Catostomidae     | <i>Carpiodes carpio</i>                         | AY366087 |
|               |                  | <i>Catostomus commersonii</i>                   | AB127394 |
|               |                  | <i>Cycleptus elongatus</i>                      | AB126082 |
|               |                  | <i>Erimyzon oblongus</i>                        | AP011228 |
|               |                  | <i>Hypentelium nigricans</i>                    | AB242169 |
|               |                  | <i>Ictiobus bubalus</i>                         | AP009316 |
|               |                  | <i>Minytrema melanops</i>                       | DQ536432 |
|               |                  | <i>Moxostoma congestum</i>                      | AP009317 |
|               |                  | <i>Moxostoma poecilurum</i>                     | AB242167 |
|               |                  | <i>Myxocyprinus asiaticus</i>                   | AY526869 |
|               |                  | <i>Xyrauchen texanus</i>                        | EU265776 |
|               | Cobitidae        | <i>Acantopsis choirorhynchus</i>                | AB242161 |
|               |                  | <i>Chromobotia macracanthus</i>                 | AB242163 |
|               |                  | <i>Cobitis choii</i>                            | EU656112 |
|               |                  | <i>Cobitis sinensis</i>                         | AY526868 |
|               |                  | <i>Cobitis striata</i>                          | AB054125 |
|               |                  | <i>Cobitis takatsuensis</i>                     | AP009306 |
|               |                  | <i>Koreocobitis naktongensis</i>                | HM535625 |
|               |                  | <i>Lefua echigonia</i>                          | AB054126 |
|               |                  | <i>Leptobotia mantschurica</i>                  | AB242170 |
|               |                  | <i>Misgurnus anguillicaudatus</i>               | DQ026434 |
|               |                  | <i>Misgurnus nikolskyi</i>                      | AB242171 |
|               |                  | <i>Niwaella delicata</i>                        | AP009308 |
|               |                  | <i>Pangio anguillaris</i>                       | AB242168 |
|               | Balitoridae      | <i>Barbatula toni</i>                           | AB242162 |
|               |                  | <i>Formosania lacustris</i>                     | M91245   |
|               |                  | <i>Homaloptera leonardi</i>                     | AB242165 |
|               |                  | <i>Schistura balteata</i>                       | AB242172 |
|               |                  | <i>Sewellia lineolata</i>                       | AP011292 |
|               |                  | <i>Sinogastromyzon puliensis</i>                | FJ605359 |
|               |                  | <i>Triplophysa stoliczkai</i>                   | JQ663847 |
|               |                  | <i>Vaillantella maassi</i>                      | AB242173 |
| Characiformes | Distichodontidae | <i>Distichodus sexfasciatus</i>                 | AB070242 |
|               | Citharinidae     | <i>Citharinus congicus</i>                      | AP011985 |
|               |                  | <i>Ichthyborus</i> sp. NM-2010                  | AP011993 |

|                  |                   |                                       |          |
|------------------|-------------------|---------------------------------------|----------|
|                  | Parodontidae      | <i>Apareiodon affinis</i>             | AP011998 |
|                  | Chilodontidae     | <i>Chilodus punctatus</i>             | AP011984 |
|                  | Hemiodontidae     | <i>Hemiodopsis gracilis</i>           | AP011990 |
|                  | Alestiidae        | <i>Chalceus macrolepidotus</i>        | AB054130 |
|                  |                   | <i>Micralestes</i> sp. NM-2010        | AP011996 |
|                  |                   | <i>Phenacogrammus interruptus</i>     | AB054129 |
|                  | Characidae        | <i>Pygocentrus nattereri</i>          | AP012000 |
|                  | Acestrorhynchidae | <i>Acestrorhynchus</i> sp. NM-2010    | AP011981 |
|                  | Cynodontidae      | <i>Hydrolycus scomberoides</i>        | AP011989 |
|                  | Lebiasinidae      | <i>Lebiasina astrigata</i>            | AP011995 |
|                  | Hepsetidae        | <i>Hepsetus odoe</i>                  | AP011991 |
| Siluriformes     | Diplomystidae     | <i>Diplomystes nahuelbutaensis</i>    | AP012011 |
|                  | Amphylidae        | <i>Amphilius</i> sp. NM-2010          | AP012002 |
|                  | Callichthyidae    | <i>Corydoras rabauti</i>              | AB054128 |
|                  | Loricariidae      | <i>Pterygoplichthys disjunctivus</i>  | AP012021 |
|                  | Amblycipitidae    | <i>Liobagrus obesus</i>               | DQ321752 |
|                  | Aspredinidae      | <i>Bunocephalus coracoideus</i>       | AP012006 |
|                  | Cranoglanididae   | <i>Cranoglanis boudierius</i>         | AY898626 |
|                  |                   | <i>Pseudobagrus brevicorpus</i>       | HM355585 |
|                  |                   | <i>Pseudobagrus tokiensis</i>         | AB054127 |
|                  | Ictaluridae       | <i>Ictalurus punctatus</i>            | AF482987 |
|                  | Mochokidae        | <i>Synodontis schoutedeni</i>         | AP012023 |
|                  | Doradidae         | <i>Amblydoras gonzalezi</i>           | AP012001 |
|                  | Auchenipteridae   | <i>Centromochlus perugiae</i>         | AP012024 |
|                  |                   | <i>Tetranematichthys quadrifilis</i>  | AP012025 |
|                  | Siluridae         | <i>Silurus asotus</i>                 | AP012022 |
|                  |                   | <i>Silurus glanis</i>                 | AM398435 |
|                  |                   | <i>Silurus lanzhouensis</i>           | JF895472 |
|                  |                   | <i>Silurus meridionalis</i>           | HM746661 |
|                  | Malapteruridae    | <i>Malapterurus electricus</i>        | AP012016 |
|                  | Auchenoglanididae | <i>Auchenoglanis occidentalis</i>     | AP012005 |
|                  | Clariidae         | <i>Clarias</i> sp. NM-2010            | AP012010 |
|                  | Heteropneustidae  | <i>Heteropneustes fossilis</i>        | AP012013 |
|                  | Schilbeidae       | <i>Pareutropius debauwi</i>           | AP012017 |
|                  | Pangasiidae       | <i>Pangasianodon gigas</i>            | AY762971 |
|                  |                   | <i>Pangasius larnaudii</i>            | KC846907 |
|                  | Bagridae          | <i>Leiocassis longirostris</i>        | GU596454 |
|                  |                   | <i>Pelteobagrus vachellii</i>         | HM746660 |
|                  |                   | <i>Tachysurus fulvidraco</i>          | KC287172 |
|                  |                   | <i>Tachysurus nitidus</i>             | KC822643 |
|                  | Pimelodidae       | <i>Pimelodus pictus</i>               | AP012019 |
| Gymnotiformes    | Rhamphichthyidae  | <i>Gymnorhamphichthys</i> sp. NM-2010 | AP011980 |
|                  | Hypopomidae       | <i>Brachyhypopomus pinnicaudatus</i>  | AP011570 |
|                  | Sternopygidae     | <i>Eigenmannia</i> sp. CBM-ZF-10620   | AB054131 |
|                  | Apteronotidae     | <i>Apteronotus albifrons</i>          | AB054132 |
| Argentiniiformes | Argentinidae      | <i>Glossanodon semifasciatus</i>      | AP004105 |
|                  | Opisthoproctidae  | <i>Opisthoproctus soleatus</i>        | AP004110 |
|                  | Microstomatidae   | <i>Nansenia ardesiaca</i>             | AP004106 |
|                  | Platyroctidae     | <i>Maulisia mauli</i>                 | AP009404 |
|                  |                   | <i>Platyroctes apus</i>               | AP004107 |
|                  | Bathylaconidae    | <i>Herwigia krefftii</i>              | AP009582 |
|                  | Alepocephalidae   | <i>Alepocephalus agassizii</i>        | AP009570 |
|                  |                   | <i>Alepocephalus australis</i>        | AP009571 |
|                  |                   | <i>Alepocephalus bairdii</i>          | AP009572 |
|                  |                   | <i>Alepocephalus bicolor</i>          | AP009399 |
|                  |                   | <i>Alepocephalus productus</i>        | AP009574 |
|                  |                   | <i>Alepocephalus umbriceps</i>        | AP009575 |

|                  |                   |                                      |          |
|------------------|-------------------|--------------------------------------|----------|
|                  |                   | <i>Bajacalifornia megalops</i>       | AP009578 |
|                  |                   | <i>Bathyprion danae</i>              | AP009400 |
|                  |                   | <i>Bathytroctes breviceps</i>        | AP009576 |
|                  |                   | <i>Bathytroctes macrolepis</i>       | AP009577 |
|                  |                   | <i>Bathytroctes michaelsarsi</i>     | AP009579 |
|                  |                   | <i>Bathytroctes microlepis</i>       | AP009401 |
|                  |                   | <i>Conocara macropterum</i>          | AP009580 |
|                  |                   | <i>Conocara murrayi</i>              | AP009581 |
|                  |                   | <i>Leptochilichthys agassizii</i>    | AP009403 |
|                  |                   | <i>Leptoderma lubricum</i>           | AP009583 |
|                  |                   | <i>Leptoderma macrophthalmum</i>     | AP011500 |
|                  |                   | <i>Leptoderma retropinna</i>         | AP009584 |
|                  |                   | <i>Narctetes erimelas</i>            | AP009405 |
|                  |                   | <i>Narctetes stomias</i>             | AP009585 |
|                  |                   | <i>Talismania bifurcata</i>          | AP009587 |
| Osmeriformes     | Osmeridae         | <i>Hypomesus nipponensis</i>         | HM106489 |
|                  |                   | <i>Mallotus villosus</i>             | HM106491 |
|                  |                   | <i>Osmerus mordax</i>                | HM106493 |
|                  |                   | <i>Plecoglossus altivelis</i>        | AB047553 |
|                  |                   | <i>Salangichthys microdon</i>        | AP004109 |
|                  |                   | <i>Salanx ariakensis</i>             | AP006231 |
|                  | Retropinnidae     | <i>Retropinna retropinna</i>         | AP004108 |
|                  | Galaxiidae        | <i>Galaxias gollumoides</i>          | HM106487 |
|                  |                   | <i>Galaxias maculatus</i>            | AP004104 |
|                  |                   | <i>Galaxias</i> sp. 'southern'       | HM106488 |
| Salmoniformes    | Salmonidae        | <i>Coregonus lavaretus</i>           | JQ390060 |
|                  |                   | <i>Hucho bleekeri</i>                | HM804473 |
|                  |                   | <i>Hucho taimen</i>                  | HQ897271 |
|                  |                   | <i>Oncorhynchus clarkii henshawi</i> | AY886762 |
|                  |                   | <i>Oncorhynchus gorbuscha</i>        | EF455489 |
|                  |                   | <i>Oncorhynchus keta</i>             | AP010773 |
|                  |                   | <i>Oncorhynchus kisutch</i>          | EF126369 |
|                  |                   | <i>Oncorhynchus masou</i> 'Biwa'     | EF105342 |
|                  |                   | <i>Oncorhynchus masou formosanus</i> | DQ858456 |
|                  |                   | <i>Oncorhynchus masou ishikawae</i>  | DQ864464 |
|                  |                   | <i>Oncorhynchus masou masou</i>      | DQ864465 |
|                  |                   | <i>Oncorhynchus mykiss</i>           | L29771   |
|                  |                   | <i>Oncorhynchus nerka</i>            | EF055889 |
|                  |                   | <i>Oncorhynchus tshawytscha</i>      | AF392054 |
|                  |                   | <i>Salmo salar</i>                   | U12143   |
|                  |                   | <i>Salmo trutta trutta</i>           | JQ390057 |
|                  |                   | <i>Salvelinus alpinus</i>            | AF154851 |
|                  |                   | <i>Salvelinus fontinalis</i>         | AF154850 |
|                  |                   | <i>Thymallus arcticus</i>            | FJ872559 |
|                  |                   | <i>Thymallus thymallus</i>           | FJ853655 |
| Esociformes      | Esocidae          | <i>Esox lucius</i>                   | AP004103 |
| Stomiiformes     | Diplophidae       | <i>Diplophos taenia</i>              | AB034825 |
| Ateleopodiformes | Ateleopodidae     | <i>Ateleopus japonicus</i>           | AP002916 |
|                  |                   | <i>Ijimaia dofleini</i>              | AP002917 |
| Aulopiformes     | Aulopidae         | <i>Aulopus japonicus</i>             | AB047821 |
|                  | Synodontidae      | <i>Harpadon microchir</i>            | AP002919 |
|                  |                   | <i>Saurida undosquamis</i>           | AP002920 |
|                  |                   | <i>Synodus variegatus</i>            | AY524977 |
|                  | Chlorophthalmidae | <i>Chlorophthalmus agassizi</i>      | AP002918 |
| Myctophiformes   | Neoscopelidae     | <i>Neoscopelus microchir</i>         | AP002921 |
| Lampriformes     | Lampridae         | <i>Lampris guttatus</i>              | AP002924 |
|                  | Stylephoridae     | <i>Stylephorus chordatus</i>         | AB280687 |

|                 |                  |                                    |          |
|-----------------|------------------|------------------------------------|----------|
| Polymixiiformes | Polymixiidae     | <i>Polymixia japonica</i>          | AB034826 |
|                 |                  | <i>Polymixia lowei</i>             | AP002927 |
| Percopsiformes  | Aphredoderidae   | <i>Aphredoderus sayanus</i>        | AP004403 |
| Gadiformes      | Macrouridae      | <i>Coelorinchus kishinouyei</i>    | AP002929 |
|                 |                  | <i>Ventrifossa garmani</i>         | AP008991 |
|                 | Moridae          | <i>Physiculus japonicus</i>        | AP004409 |
|                 | Merlucciidae     | <i>Merluccius merluccius</i>       | FR751402 |
|                 | Gadidae          | <i>Arctogadus glacialis</i>        | AM919429 |
|                 |                  | <i>Gadus chalcogrammus</i>         | AB094061 |
|                 |                  | <i>Gadus morhua</i>                | X99772   |
|                 |                  | <i>Gadus ogac</i>                  | DQ356941 |
|                 |                  | <i>Lota lota</i>                   | AP004412 |
|                 |                  | <i>Melanogrammus aeglefinus</i>    | DQ020497 |
|                 |                  | <i>Merlangius merlangus</i>        | DQ020496 |
|                 |                  | <i>Micromesistius poutassou</i>    | FR751401 |
|                 |                  | <i>Pollachius pollachius</i>       | FR751400 |
|                 |                  | <i>Pollachius virens</i>           | FR751399 |
| Ophidiiformes   | Ophidiidae       | <i>Bassozetus zenkevitchi</i>      | AP004405 |
|                 |                  | <i>Lamprogrammus niger</i>         | AP004410 |
|                 |                  | <i>Sirembo imberbis</i>            | AP004406 |
|                 | Bythitidae       | <i>Cataetyx rubrirostris</i>       | AP004407 |
|                 |                  | <i>Diplacanthopoma brachysoma</i>  | AP004408 |
| Lophiiformes    | Lophiidae        | <i>Lophiodes caulinaris</i>        | AB282826 |
|                 |                  | <i>Lophiomus setigerus</i>         | AP004413 |
|                 |                  | <i>Sladenia gardineri</i>          | AB282827 |
|                 | Chaunacidae      | <i>Chaunax abei</i>                | AP004415 |
|                 |                  | <i>Chaunax pictus</i>              | AB282833 |
|                 |                  | <i>Chaunax tosaensis</i>           | AP004416 |
|                 | Ogcocephalidae   | <i>Coelophrys brevicaudata</i>     | AB282834 |
|                 | Caulophryidae    | <i>Caulophryne pelagica</i>        | AB282836 |
|                 | Neoceratiidae    | <i>Neoceratias spinifer</i>        | AB282837 |
|                 | Himantolophidae  | <i>Himantolophus albinares</i>     | AB282839 |
|                 |                  | <i>Himantolophus groenlandicus</i> | AB282840 |
|                 | Diceratiidae     | <i>Bufoceratias thele</i>          | AB282841 |
|                 |                  | <i>Diceratias pileatus</i>         | AB282842 |
| Mugiliformes    | Mugilidae        | <i>Agonostomus monticola</i>       | JF911702 |
|                 |                  | <i>Aldrichetta forsteri</i>        | JF911703 |
|                 |                  | <i>Chaenomugil proboscideus</i>    | JF911705 |
|                 |                  | <i>Chelon labrosus</i>             | JF911706 |
|                 |                  | <i>Crenimugil crenilabis</i>       | JF911707 |
|                 |                  | <i>Liza affinis</i>                | JF911709 |
|                 |                  | <i>Mugil cephalus</i>              | AP002930 |
|                 |                  | <i>Mugil curema</i>                | JF911710 |
|                 |                  | <i>Myxus capensis</i>              | JF911711 |
|                 |                  | <i>Oedalechilus labeo</i>          | JF911712 |
|                 |                  | <i>Rhinomugil nasutus</i>          | JF911714 |
|                 |                  | <i>Sicamugil cascasia</i>          | JF911715 |
| Atheriniiformes | Atherinopsidae   | <i>Menidia menidia</i>             | AB370893 |
|                 |                  | <i>Odontesthes</i> sp. Odsp-001    | AB370894 |
|                 | Notocheiridae    | <i>Iso hawaiiensis</i>             | AB373006 |
|                 | Melanotaeniidae  | <i>Melanotaenia lacustris</i>      | AP004419 |
|                 | Atherinidae      | <i>Hypoatherina tsurugae</i>       | AP004420 |
| Beloniformes    | Adrianichthyidae | <i>Oryzias dancena</i>             | AB498069 |
|                 |                  | <i>Oryzias javanicus</i>           | AB498067 |
|                 |                  | <i>Oryzias latipes</i>             | AP004421 |
|                 |                  | <i>Oryzias luzonensis</i>          | AB498064 |
|                 |                  | <i>Oryzias minutillus</i>          | AB498068 |

|                      |                  |                                    |          |
|----------------------|------------------|------------------------------------|----------|
|                      |                  | <i>Oryzias sarasinorum</i>         | AB370891 |
|                      |                  | <i>Oryzias sinensis</i>            | GU013788 |
|                      | Exocoetidae      | <i>Cypselurus hiraii</i>           | AB182653 |
|                      |                  | <i>Exocoetus volitans</i>          | AP002933 |
|                      | Belonidae        | <i>Ablennes hians</i>              | AB373007 |
|                      | Scomberesocidae  | <i>Cololabis saira</i>             | AP002932 |
| Cyprinodontiformes   | Aplocheilidae    | <i>Aplocheilus panchax</i>         | AB373005 |
|                      |                  | <i>Nothobranchius furzeri</i>      | EU650204 |
|                      | Fundulidae       | <i>Fundulus diaphanus</i>          | FJ445394 |
|                      |                  | <i>Fundulus grandis</i>            | FJ445396 |
|                      |                  | <i>Fundulus heteroclitus</i>       | FJ445402 |
|                      |                  | <i>Fundulus olivaceus</i>          | AP006776 |
|                      | Cyprinodontidae  | <i>Cyprinodon rubrofluvialis</i>   | EF442803 |
|                      |                  | <i>Jordanella floridae</i>         | AP006778 |
|                      | Poeciliidae      | <i>Gambusia affinis</i>            | AP004422 |
|                      |                  | <i>Xiphophorus hellerii</i>        | FJ226476 |
|                      |                  | <i>Xiphophorus maculatus</i>       | AP005982 |
| Stephanoberyciformes | Rondeletiididae  | <i>Rondeletia loricata</i>         | AP002937 |
|                      | Barbourisiidae   | <i>Barbourisia rufa</i>            | AP010879 |
|                      | Cetomimidae      | <i>Cetomimus</i> sp. AMS I34481001 | AP010881 |
|                      |                  | <i>Cetostoma regani</i>            | AP004423 |
|                      |                  | <i>Danacetichthys galathenus</i>   | AP002936 |
|                      |                  | <i>Gyrimomimus myersi</i>          | AP010884 |
|                      |                  | <i>Gyrimomimus</i> sp. UW 113191   | AP010883 |
|                      |                  | <i>Procetichthys krefftii</i>      | AP010880 |
|                      | Mirapinnidae     | <i>Eutaeniophorus festivus</i>     | AP010885 |
|                      |                  | <i>Eutaeniophorus</i> sp. 033-Miya | AP004424 |
|                      |                  | <i>Parataeniophorus gulosus</i>    | AP010886 |
|                      | Megalomycteridae | <i>Ataxolepis apus</i>             | AP010887 |
| Beryciformes         | Anoplogastridae  | <i>Anoplogaster cornuta</i>        | AP004425 |
|                      | Anomalopidae     | <i>Anomalops katoptron</i>         | AP004428 |
|                      | Monocentridae    | <i>Monocentris japonicus</i>       | AP004429 |
|                      | Trachichthyidae  | <i>Hoplostethus japonicus</i>      | AP002938 |
|                      | Berycidae        | <i>Beryx decadactylus</i>          | AP004430 |
|                      |                  | <i>Beryx mollis</i>                | DQ993168 |
|                      |                  | <i>Beryx splendens</i>             | AP002939 |
|                      | Holocentridae    | <i>Myripristis berndti</i>         | AP002940 |
|                      |                  | <i>Ostichthys japonicus</i>        | AP004431 |
|                      |                  | <i>Sargocentron rubrum</i>         | AP004432 |
| Zeiformes            | Oreosomatidae    | <i>Alloctytus niger</i>            | AP004435 |
|                      |                  | <i>Neocyttus rhomboidalis</i>      | AP004436 |
|                      | Parazenidae      | <i>Parazen pacificus</i>           | AP004433 |
|                      | Zenionidae       | <i>Zenion japonicum</i>            | AP004434 |
|                      | Zeidae           | <i>Zenopsis nebulosus</i>          | AP002942 |
|                      |                  | <i>Zeus faber</i>                  | AP002941 |
| Gasterosteiformes    | Hypoptychidae    | <i>Hypoptychus dybowskii</i>       | AP004437 |
|                      | Aulorhynchidae   | <i>Aulichthys japonicus</i>        | AB445127 |
|                      |                  | <i>Aulorhynchus flavidus</i>       | AP009196 |
|                      | Gasterosteidae   | <i>Apeltes quadracus</i>           | AB445126 |
|                      |                  | <i>Culaea inconstans</i>           | AB445125 |
|                      |                  | <i>Gasterosteus aculeatus</i>      | AP002944 |
|                      |                  | <i>Gasterosteus wheatlandi</i>     | AB445129 |
|                      |                  | <i>Pungitius kaibarae</i>          | EU332749 |
|                      |                  | <i>Pungitius pungitius</i>         | AB445130 |
|                      |                  | <i>Pungitius sinensis</i>          | EU332748 |
|                      |                  | <i>Spinachia spinachia</i>         | AB445128 |
|                      | Indostomidae     | <i>Indostomus paradoxus</i>        | AP004438 |

|                  |                  |                                        |          |
|------------------|------------------|----------------------------------------|----------|
|                  | Pegasidae        | <i>Eurypegasus draconis</i>            | AP005983 |
|                  |                  | <i>Pegasus volitans</i>                | AP005984 |
|                  | Solenostomidae   | <i>Solenostomus cyanopterus</i>        | AB277725 |
|                  | Syngnathidae     | <i>Hippocampus kuda</i>                | AP005985 |
|                  |                  | <i>Microphis brachyurus</i>            | AP005986 |
|                  | Fistulariidae    | <i>Fistularia commersonii</i>          | AP005987 |
|                  | Macroramphosidae | <i>Macroramphosus scolopax</i>         | AP005988 |
|                  | Centriscidae     | <i>Aeoliscus strigatus</i>             | AP009198 |
| Synbranchiformes | Synbranchidae    | <i>Monopterus albus</i>                | AP002945 |
|                  | Mastacembelidae  | <i>Mastacembelus favus</i>             | AP002946 |
| Scorpaeniformes  | Dactylopteridae  | <i>Dactyloptena peterseni</i>          | AP002947 |
|                  |                  | <i>Dactyloptena tiltoni</i>            | AP004440 |
|                  | Scorpaenidae     | <i>Helicolenus hilgendorfi</i>         | AP002948 |
|                  |                  | <i>Sebastes schlegelii</i>             | AY491978 |
|                  |                  | <i>Sebastiscus marmoratus</i>          | GU452728 |
|                  | Peristediidae    | <i>Scalicus amiscus</i>                | AP004441 |
|                  | Cottidae         | <i>Cottus hangiongensis</i>            | EU332751 |
|                  |                  | <i>Cottus poecilopus</i>               | EU332750 |
|                  |                  | <i>Cottus reinii</i>                   | AP004442 |
|                  | Cyclopteridae    | <i>Aptocyclus ventricosus</i>          | AP004443 |
| Perciformes      | Latidae          | <i>Lates calcarifer</i>                | DQ010541 |
|                  | Moronidae        | <i>Coreoperca kawamebari</i>           | AP005990 |
|                  |                  | <i>Lateolabrax japonicus</i>           | JQ860109 |
|                  |                  | <i>Morone saxatilis</i>                | HM447585 |
|                  |                  | <i>Siniperca chuatsi</i>               | JF972568 |
|                  |                  | <i>Siniperca kneri</i>                 | JN378751 |
|                  |                  | <i>Siniperca scherzeri</i>             | JN084101 |
|                  | Percichthyidae   | <i>Nannoperca australis</i>            | JF519732 |
|                  |                  | <i>Nannoperca obscura</i>              | JF519733 |
|                  | Acropomatidae    | <i>Doederleinia berycoides</i>         | AP009181 |
|                  | Serranidae       | <i>Anyperodon leucogrammicus</i>       | GQ131336 |
|                  |                  | <i>Epinephelus akaara</i>              | EU043377 |
|                  |                  | <i>Epinephelus bruneus</i>             | FJ594964 |
|                  |                  | <i>Epinephelus coioides</i>            | EU043376 |
|                  |                  | <i>Epinephelus lanceolatus</i>         | FJ472837 |
|                  |                  | <i>Epinephelus moara</i>               | JQ518290 |
|                  |                  | <i>Hyporthodus septemfasciatus</i>     | FJ594966 |
|                  |                  | <i>Plectropomus leopardus</i>          | DQ101270 |
|                  | Pseudochromidae  | <i>Labracinus cyclophthalmus</i>       | AP009125 |
|                  | Opistognathidae  | <i>Opistognathus jacksoniensis</i>     | JF911713 |
|                  | Centrarchidae    | <i>Lepomis macrochirus</i>             | JN389795 |
|                  |                  | <i>Micropterus dolomieu</i>            | AB378749 |
|                  |                  | <i>Micropterus floridanus</i>          | HQ391897 |
|                  |                  | <i>Micropterus salmoides</i>           | DQ536425 |
|                  |                  | <i>Micropterus salmoides salmoides</i> | HQ391896 |
|                  | Percidae         | <i>Etheostoma radiosum</i>             | AY341348 |
|                  |                  | <i>Percina macrolepidia</i>            | DQ536430 |
|                  | Sillaginidae     | <i>Sillago sihama</i>                  | JQ048935 |
|                  | Malacanthidae    | <i>Branchiostegus albus</i>            | EU861053 |
|                  |                  | <i>Branchiostegus argentatus</i>       | EU861054 |
|                  |                  | <i>Branchiostegus japonicus</i>        | EU861052 |
|                  | Carangidae       | <i>Carangoides armatus</i>             | AP004444 |
|                  |                  | <i>Caranx melampygus</i>               | AP004445 |
|                  |                  | <i>Seriola dumerili</i>                | AB517558 |
|                  |                  | <i>Seriola lalandi</i>                 | AB517557 |
|                  |                  | <i>Seriola quinqueradiata</i>          | AB517556 |
|                  |                  | <i>Trachurus japonicus</i>             | AP003091 |

|                 |                                        |          |
|-----------------|----------------------------------------|----------|
|                 | <i>Trachurus trachurus</i>             | AB108498 |
| Emmelichthyidae | <i>Emmelichthys struhsakeri</i>        | AP004446 |
| Lutjanidae      | <i>Lutjanus argentimaculatus</i>       | JN182927 |
|                 | <i>Lutjanus bengalensis</i>            | FJ171339 |
|                 | <i>Lutjanus kasmira</i>                | FJ416614 |
|                 | <i>Lutjanus malabaricus</i>            | FJ824741 |
|                 | <i>Lutjanus rivulatus</i>              | AP006000 |
|                 | <i>Lutjanus russellii</i>              | EF514208 |
|                 | <i>Lutjanus sebae</i>                  | FJ824742 |
|                 | <i>Pterocaesio tile</i>                | AP004447 |
| Haemulidae      | <i>Diagramma picta</i>                 | AP009167 |
|                 | <i>Hapalogenys nigripinnis</i>         | HM754620 |
|                 | <i>Parapristipoma trilineatum</i>      | AP009168 |
| Lethrinidae     | <i>Monotaxis grandoculis</i>           | AP009166 |
| Sparidae        | <i>Acanthopagrus latus</i>             | EF506764 |
|                 | <i>Pagellus bogaraveo</i>              | AB305023 |
|                 | <i>Pagrus auriga</i>                   | AB124801 |
|                 | <i>Pagrus major</i>                    | AP002949 |
|                 | <i>Parargyrops edita</i>               | EF107158 |
|                 | <i>Spicara maena</i>                   | AP009164 |
| Sciaenidae      | <i>Argyrosomus japonicus</i>           | JQ728563 |
|                 | <i>Chrysochir aureus</i>               | JQ692068 |
|                 | <i>Collichthys lucidus</i>             | HM447239 |
|                 | <i>Collichthys niveatus</i>            | HM219223 |
|                 | <i>Dendrophysa russelii</i>            | JQ728562 |
|                 | <i>Larimichthys crocea</i>             | EU339149 |
|                 | <i>Larimichthys polyactis</i>          | FJ618559 |
|                 | <i>Miichthys miiuy</i>                 | HM447240 |
|                 | <i>Nibea albiflora</i>                 | HQ890947 |
|                 | <i>Pennahia argentata</i>              | HQ890946 |
|                 | <i>Sciaenops ocellatus</i>             | JQ286004 |
| Monodactylidae  | <i>Monodactylus argenteus</i>          | AP009169 |
| Toxotidae       | <i>Toxotes chatareus</i>               | AP006806 |
| Arripidae       | <i>Arripis trutta</i>                  | AP006810 |
| Kyphosidae      | <i>Girella punctata</i>                | AP011060 |
|                 | <i>Kyphosus cinerascens</i>            | AP011061 |
|                 | <i>Labracoglossa argentiventris</i>    | AP011062 |
|                 | <i>Microcanthus strigatus</i>          | AP006009 |
|                 | <i>Oplegnathus fasciatus</i>           | DQ872160 |
|                 | <i>Oplegnathus punctatus</i>           | AP011066 |
|                 | <i>Scorpis lineolata</i>               | AP011063 |
| Chaetodontidae  | <i>Chaetodon auripes</i>               | AP006004 |
|                 | <i>Heniochus diphreutes</i>            | AP006005 |
| Pomacanthidae   | <i>Centropyge loricula</i>             | AP006006 |
|                 | <i>Chaetodontoplus septentrionalis</i> | AP006007 |
| Enoplosidae     | <i>Enoplosus armatus</i>               | AP006008 |
| Pentacerotidae  | <i>Histiopterus typus</i>              | AP006807 |
| Terapontidae    | <i>Rhynchopelates oxyrhynchus</i>      | AP011064 |
| Elassomatidae   | <i>Elassoma evergladei</i>             | AP002950 |
|                 | <i>Elassoma zonatum</i>                | AP006813 |
| Cichlidae       | <i>Astronotus ocellatus</i>            | AP009127 |
|                 | <i>Etoplus maculatus</i>               | AP009505 |
|                 | <i>Hypselecara temporalis</i>          | AP009506 |
|                 | <i>Neolamprologus brichardi</i>        | AP006014 |
|                 | <i>Oreochromis aureus</i>              | GU370125 |
|                 | <i>Oreochromis mossambicus</i>         | AY597335 |
|                 | <i>Oreochromis niloticus</i>           | GU238433 |

|                 |                                      |          |
|-----------------|--------------------------------------|----------|
|                 | <i>Oreochromis</i> sp. 'red tilapia' | HM067614 |
|                 | <i>Oreochromis</i> sp. KM-2006       | AP009126 |
|                 | <i>Paratilapia polleni</i>           | AP009508 |
|                 | <i>Paretroplus maculatus</i>         | AP009504 |
|                 | <i>Ptychochromoides katria</i>       | AP009507 |
|                 | <i>Sarotherodon melanotheron</i>     | JF894132 |
|                 | <i>Tropheus duboisi</i>              | AP006015 |
|                 | <i>Tylochromis polylepis</i>         | AP009509 |
| Embiotocidae    | <i>Cymatogaster aggregata</i>        | AP009128 |
|                 | <i>Ditrema temminckii</i>            | AP009129 |
| Pomacentridae   | <i>Abudefduf vaigiensis</i>          | AP006016 |
|                 | <i>Amphiprion bicinctus</i>          | JQ030887 |
|                 | <i>Amphiprion ocellaris</i>          | AP006017 |
| Labridae        | <i>Halichoeres melanurus</i>         | AP006018 |
|                 | <i>Halichoeres tenuispinis</i>       | EU082205 |
|                 | <i>Halichoeres trimaculatus</i>      | EU087704 |
|                 | <i>Parajulis poecilepterus</i>       | EF192032 |
|                 | <i>Pseudolabrus eoethinus</i>        | EU560728 |
|                 | <i>Pseudolabrus sieboldi</i>         | AP006019 |
|                 | <i>Pteragogus flagellifer</i>        | EF409976 |
| Odacidae        | <i>Odax cyanomelas</i>               | AP009130 |
| Scaridae        | <i>Chlorurus sordidus</i>            | AP006567 |
|                 | <i>Scarus forsteni</i>               | FJ619271 |
|                 | <i>Scarus ghobban</i>                | FJ449707 |
|                 | <i>Scarus rubroviolaceus</i>         | FJ227899 |
|                 | <i>Scarus schlegeli</i>              | FJ595020 |
| Pholidae        | <i>Pholis crassispina</i>            | AP004449 |
| Anarhichadidae  | <i>Anarhichas lupus</i>              | EF427916 |
| Nototheniidae   | <i>Notothenia coriiceps</i>          | JF933906 |
|                 | <i>Pleuragramma antarctica</i>       | JF933905 |
| Channichthyidae | <i>Chaenocephalus aceratus</i>       | JF933907 |
|                 | <i>Chionodraco myersi</i>            | DQ526430 |
| Trichodontidae  | <i>Arctoscopus japonicus</i>         | AP003090 |
| Blenniidae      | <i>Petroscirtes breviceps</i>        | AP004450 |
|                 | <i>Salarias fasciatus</i>            | AP004451 |
| Gobiesocidae    | <i>Arcos</i> sp. KU-149              | AP004452 |
| Rhyacichthyidae | <i>Rhyacichthys aspro</i>            | AP004454 |
| Eleotridae      | <i>Bostrychus sinensis</i>           | JQ665462 |
|                 | <i>Eleotris acanthopoma</i>          | AP004455 |
| Gobiidae        | <i>Acanthogobius hasta</i>           | AY486321 |
|                 | <i>Acentrogobius pflaumii</i>        | KC196074 |
|                 | <i>Boleophthalmus pectinirostris</i> | JN631352 |
|                 | <i>Gillichthys mirabilis</i>         | FJ211845 |
|                 | <i>Gillichthys seta</i>              | FJ211846 |
|                 | <i>Glossogobius olivaceus</i>        | JQ001860 |
|                 | <i>Gymnogobius petschiliensis</i>    | AY525784 |
|                 | <i>Oxuderces dentatus</i>            | JN831381 |
|                 | <i>Scartelaos histophorus</i>        | JQ654459 |
|                 | <i>Stiphodon alcedo</i>              | AB613000 |
|                 | <i>Tridentiger bifasciatus</i>       | JN244650 |
|                 | <i>Trypauchen vagina</i>             | JQ027694 |
| Ephippidae      | <i>Platax orbicularis</i>            | AP006825 |
| Siganidae       | <i>Siganus fuscescens</i>            | EF025185 |
|                 | <i>Siganus unimaculatus</i>          | AP006031 |
| Luvaridae       | <i>Luvarus imperialis</i>            | AP009161 |
| Zanclidae       | <i>Zanclus cornutus</i>              | AP009162 |
| Acanthuridae    | <i>Acanthurus leucosternon</i>       | EU136032 |

|                   |                 |                                       |          |
|-------------------|-----------------|---------------------------------------|----------|
|                   |                 | <i>Acanthurus lineatus</i>            | EU273284 |
|                   |                 | <i>Naso lopezi</i>                    | AP009163 |
|                   |                 | <i>Zebrasoma flavescens</i>           | AP006032 |
|                   | Trichiuridae    | <i>Trichiurus japonicus</i>           | EU339148 |
|                   | Scombridae      | <i>Auxis rochei</i>                   | AB103467 |
|                   |                 | <i>Auxis thazard</i>                  | AB105447 |
|                   |                 | <i>Euthynnus alletteratus</i>         | AB099716 |
|                   |                 | <i>Katsuwonus pelamis</i>             | AB101290 |
|                   |                 | <i>Rastrelliger brachysoma</i>        | EU555283 |
|                   |                 | <i>Scomber australasicus</i>          | AB488407 |
|                   |                 | <i>Scomber colias</i>                 | AB488406 |
|                   |                 | <i>Scomber japonicus</i>              | AB488405 |
|                   |                 | <i>Scomber scombrus</i>               | AB120717 |
|                   |                 | <i>Scomberomorus cavalla</i>          | DQ536428 |
|                   |                 | <i>Scomberomorus niphonius</i>        | GU109281 |
|                   |                 | <i>Thunnus alalunga</i>               | AB101291 |
|                   |                 | <i>Thunnus albacares</i>              | GU256528 |
|                   |                 | <i>Thunnus maccoyii</i>               | GU256523 |
|                   |                 | <i>Thunnus obesus</i>                 | GU256525 |
|                   |                 | <i>Thunnus orientalis</i>             | AB185022 |
|                   |                 | <i>Thunnus thynnus</i>                | GU256522 |
|                   |                 | <i>Thunnus thynnus thynnus</i>        | AY302574 |
|                   | Xiphiidae       | <i>Xiphias gladius</i>                | AB470301 |
|                   | Istiophoridae   | <i>Makaira indica</i>                 | AB470305 |
|                   |                 | <i>Istiophorus platypterus</i>        | AB470306 |
|                   |                 | <i>Kajikia audax</i>                  | AB470302 |
|                   |                 | <i>Makaira mazara</i>                 | AB470304 |
|                   |                 | <i>Tetrapturus angustirostris</i>     | AB470303 |
|                   | Centrolophidae  | <i>Hyperoglyphe japonica</i>          | AB752307 |
|                   | Nomeidae        | <i>Cubiceps pauciradiatus</i>         | AP006038 |
|                   |                 | <i>Psenes cyanophrys</i>              | AP011067 |
|                   | Stromateidae    | <i>Pampus</i> sp. LY-2009             | EU357803 |
|                   | Channidae       | <i>Channa argus</i>                   | GU937112 |
|                   | Caproidae       | <i>Antigonia capros</i>               | AP002943 |
|                   |                 | <i>Capros aper</i>                    | AP009159 |
| Pleuronectiformes | Paralichthyidae | <i>Paralichthys olivaceus</i>         | AB028664 |
|                   | Pleuronectidae  | <i>Hippoglossus hippoglossus</i>      | AM749122 |
|                   |                 | <i>Hippoglossus stenolepis</i>        | AM749126 |
|                   |                 | <i>Kareius bicoloratus</i>            | AP002951 |
|                   |                 | <i>Platichthys stellatus</i>          | EF424428 |
|                   |                 | <i>Reinhardtius hippoglossoides</i>   | AM749130 |
|                   |                 | <i>Verasper moseri</i>                | EF025506 |
|                   |                 | <i>Verasper variegatus</i>            | DQ403797 |
|                   | Soleidae        | <i>Solea senegalensis</i>             | KF142459 |
|                   | Cynoglossidae   | <i>Cynoglossus abbreviatus</i>        | GQ380410 |
| Tetraodontiformes | Triacanthodidae | <i>Macrorhamphosodes uradoi</i>       | AP009171 |
|                   |                 | <i>Triacanthodes anomalus</i>         | AP009172 |
|                   | Triacanthidae   | <i>Triacanthus biaculeatus</i>        | AP009174 |
|                   |                 | <i>Triphichthys weberi</i>            | AP009173 |
|                   | Balistidae      | <i>Abalistes stellaris</i>            | AP009202 |
|                   |                 | <i>Balistapus undulatus</i>           | AP009203 |
|                   |                 | <i>Balistes vetula</i>                | AP009204 |
|                   |                 | <i>Balistoides conspicillum</i>       | AP009205 |
|                   |                 | <i>Canthidermis maculata</i>          | AP009206 |
|                   |                 | <i>Melichthys vidua</i>               | AP009207 |
|                   |                 | <i>Odonus niger</i>                   | AP009208 |
|                   |                 | <i>Pseudobalistes flavimarginatus</i> | AP009209 |

|                |                                       |          |
|----------------|---------------------------------------|----------|
|                | <i>Rhinecanthus aculeatus</i>         | AP009210 |
|                | <i>Sufflamen fraenatum</i>            | AP004456 |
|                | <i>Xanthichthys auromarginatus</i>    | AP009211 |
|                | <i>Xenobalistes tumidipectoris</i>    | AP009182 |
| Monacanthidae  | <i>Acanthaluteres brownii</i>         | AP009212 |
|                | <i>Acreichthys tomentosus</i>         | AP009213 |
|                | <i>Aluterus scriptus</i>              | AP009183 |
|                | <i>Amanses scopas</i>                 | AP009214 |
|                | <i>Brachaluteres ulvarum</i>          | AP009215 |
|                | <i>Cantherhines pardalis</i>          | AP009184 |
|                | <i>Chaetodermis penicilligerus</i>    | AP009216 |
|                | <i>Eubalichthys mosaicus</i>          | AP009217 |
|                | <i>Meuschenia hippocrepis</i>         | AP009218 |
|                | <i>Monacanthus chinensis</i>          | AP009219 |
|                | <i>Nelusetta ayraudi</i>              | AP009220 |
|                | <i>Paraluteres prionurus</i>          | AP009222 |
|                | <i>Paramonacanthus choirocephalus</i> | AP009223 |
|                | <i>Pervagor janthinosoma</i>          | AP009224 |
|                | <i>Pseudomonacanthus peroni</i>       | AP009225 |
|                | <i>Rudarius ercodes</i>               | AP009227 |
|                | <i>Scobinichthys granulatus</i>       | AP009228 |
|                | <i>Stephanolepis cirrhifer</i>        | AP002952 |
|                | <i>Thamnaconus modestus</i>           | AP009185 |
| Ostraciidae    | <i>Anoplocapros lenticularis</i>      | AP009186 |
|                | <i>Kentrocapros aculeatus</i>         | AP009175 |
|                | <i>Lactoria diaphana</i>              | AP009187 |
|                | <i>Ostracion immaculatus</i>          | AP009176 |
| Triodontidae   | <i>Triodon macropterus</i>            | AP009170 |
| Tetraodontidae | <i>Arothron firmamentum</i>           | AP006742 |
|                | <i>Arothron hispidus</i>              | AP011930 |
|                | <i>Arothron manilensis</i>            | AP011929 |
|                | <i>Canthigaster coronata</i>          | AP006743 |
|                | <i>Canthigaster jactator</i>          | AP011911 |
|                | <i>Canthigaster rivulata</i>          | AP006744 |
|                | <i>Canthigaster valentini</i>         | AP006744 |
|                | <i>Carinotetraodon lorteti</i>        | AP011918 |
|                | <i>Carinotetraodon salivator</i>      | AP011919 |
|                | <i>Chelonodon pleurospilus</i>        | AP011928 |
|                | <i>Colomesus asellus</i>              | AP011909 |
|                | <i>Colomesus psittacus</i>            | AP011910 |
|                | <i>Lagocephalus laevigatus</i>        | AP011934 |
|                | <i>Lagocephalus lagocephalus</i>      | AP011933 |
|                | <i>Lagocephalus lunaris</i>           | GQ461750 |
|                | <i>Lagocephalus sceleratus</i>        | AP011932 |
|                | <i>Lagocephalus wheeleri</i>          | AP009538 |
|                | <i>Leiodon cutcutia</i>               | AP011924 |
|                | <i>Marilyna darwinii</i>              | AP011937 |
|                | <i>Monotrete cochinchinensis</i>      | KF667490 |
|                | <i>Omegophora armilla</i>             | AP011936 |
|                | <i>Pelagocephalus marki</i>           | AP011938 |
|                | <i>Polyspina piosae</i>               | AP011913 |
|                | <i>Sphoeroides annulatus</i>          | AP011915 |
|                | <i>Sphoeroides pachygaster</i>        | AP006745 |
|                | <i>Sphoeroides parvus</i>             | AP011914 |
|                | <i>Sphoeroides testudineus</i>        | AP011916 |
|                | <i>Takifugu chinensis</i>             | AP009534 |
|                | <i>Takifugu chrysops</i>              | AP009525 |

|                   |                 |                                   |          |
|-------------------|-----------------|-----------------------------------|----------|
|                   |                 | <i>Takifugu exascurus</i>         | AP009540 |
|                   |                 | <i>Takifugu fasciatus</i>         | GQ409967 |
|                   |                 | <i>Takifugu niphobles</i>         | AP009526 |
|                   |                 | <i>Takifugu oblongus</i>          | AP009535 |
|                   |                 | <i>Takifugu obscurus</i>          | AP009527 |
|                   |                 | <i>Takifugu ocellatus</i>         | AP009536 |
|                   |                 | <i>Takifugu pardalis</i>          | AP009528 |
|                   |                 | <i>Takifugu poecilonotus</i>      | AP009539 |
|                   |                 | <i>Takifugu porphyreus</i>        | AP009529 |
|                   |                 | <i>Takifugu rubripes</i>          | AJ421455 |
|                   |                 | <i>Takifugu snyderi</i>           | AP009531 |
|                   |                 | <i>Takifugu stictonotus</i>       | AP009530 |
|                   |                 | <i>Takifugu vermicularis</i>      | AP009532 |
|                   |                 | <i>Takifugu xanthopterus</i>      | AP009533 |
|                   |                 | <i>Tetractenos glaber</i>         | AP011935 |
|                   |                 | <i>Tetraodon biocellatus</i>      | AP011921 |
|                   |                 | <i>Tetraodon mbu</i>              | AP011923 |
|                   |                 | <i>Tetraodon miurus</i>           | AP011922 |
|                   |                 | <i>Tetraodon nigroviridis</i>     | DQ019313 |
|                   |                 | <i>Tetraodon palembangensis</i>   | AP011920 |
|                   |                 | <i>Torquigener brevipennis</i>    | AP009537 |
|                   |                 | <i>Torquigener hypselogeneion</i> | AP011927 |
|                   |                 | <i>Torquigener pleurogramma</i>   | AP011926 |
|                   |                 | <i>Tylerius spinosissimus</i>     | AP011939 |
|                   | Diodontidae     | <i>Chilomycterus reticulatus</i>  | AP009188 |
|                   |                 | <i>Diodon holocanthus</i>         | AP009177 |
|                   | Molidae         | <i>Masturus lanceolatus</i>       | AP006239 |
|                   |                 | <i>Mola mola</i>                  | AP006238 |
|                   |                 | <i>Ranzania laevis</i>            | AP006047 |
| Ceratodontiformes | Ceratodontidae  | <i>Neoceratodus forsteri</i>      | AF302933 |
|                   | Lepidosirenidae | <i>Lepidosiren paradoxa</i>       | AF302934 |

---

Table S2.

A list of fish species used for designing universal primers specifically designed for elasmobranchs (MiFish-E) including 160 species placed in 12 orders, 39 families and 77 genera.

| Order                    | Family                 | Species                              | Accession No.                   |          |
|--------------------------|------------------------|--------------------------------------|---------------------------------|----------|
| Heterodontiformes        | Heterodontidae         | <i>Heterodontus francisci</i>        | AJ310141                        |          |
|                          |                        | <i>Heterodontus zebra</i>            | KC845548                        |          |
| Orectolobiformes         | Orectolobidae          | <i>Orectolobus japonicus</i>         | KF111729                        |          |
|                          | Hemiscylliidae         | <i>Chiloscyllium griseum</i>         | JQ434458                        |          |
|                          |                        | <i>Chiloscyllium plagiosum</i>       | JX162601                        |          |
|                          |                        | <i>Chiloscyllium punctatum</i>       | JQ082337                        |          |
| Lamniformes              | Ginglymostomatidae     | <i>Ginglymostoma cirratum</i>        | AY147890                        |          |
|                          | Rhincodontidae         | <i>Rhincodon typus</i>               | KC633221                        |          |
|                          | Odontaspidae           | <i>Carcharias taurus</i>             | KF569943                        |          |
|                          | Mitsukurinidae         | <i>Mitsukurina owstoni</i>           | EU528659                        |          |
|                          | Megachasmidae          | <i>Megachasma pelagios</i>           | KC702506                        |          |
|                          |                        | <i>Alopias pelagicus</i>             | KF412639                        |          |
|                          |                        | <i>Alopias superciliosus</i>         | KC757415                        |          |
|                          |                        | <i>Alopias vulpinus</i>              | AY147892                        |          |
|                          |                        | Cetorhinidae                         | <i>Cetorhinus maximus</i>       | KF597303 |
|                          |                        | Lamnidae                             | <i>Carcharodon carcharias</i>   | AY147893 |
| <i>Isurus oxyrinchus</i> | KF361861               |                                      |                                 |          |
| <i>Isurus paucus</i>     | KJ616742               |                                      |                                 |          |
| <i>Lamna ditropis</i>    | KF962053               |                                      |                                 |          |
| <i>Lamna nasus</i>       | AY147896               |                                      |                                 |          |
| Carcharhiniformes        | Scyliorhinidae         |                                      | <i>Apristurus longicephalus</i> | GU130599 |
|                          | Pseudotriakidae        | <i>Pseudotriakis microdon</i>        | AB560493                        |          |
|                          | Triakidae              | <i>Mustelus griseus</i>              | KF889325                        |          |
|                          |                        | <i>Mustelus manazo</i>               | AB015962                        |          |
|                          | Carcharhinidae         | <i>Carcharhinus acronotus</i>        | KF728380                        |          |
|                          |                        | <i>Carcharhinus amblyrhynchoides</i> | KF956523                        |          |
|                          |                        | <i>Carcharhinus falciformis</i>      | KF801102                        |          |
|                          |                        | <i>Carcharhinus leucas</i>           | KF646785                        |          |
|                          |                        | <i>Carcharhinus melanopterus</i>     | KJ720818                        |          |
|                          |                        | <i>Carcharhinus obscurus</i>         | KC470543                        |          |
|                          |                        | <i>Carcharhinus sorrah</i>           | KF612341                        |          |
|                          |                        | <i>Galeocerdo cuvier</i>             | KF111728                        |          |
|                          |                        | <i>Glyphis garricki</i>              | KF646786                        |          |
|                          |                        | <i>Glyphis glyphis</i>               | KF006312                        |          |
|                          |                        | <i>Prionace glauca</i>               | KF356249                        |          |
|                          |                        | <i>Scoliodon macrorhynchus</i>       | JQ693102                        |          |
| Sphyrnidae               |                        | <i>Sphyrna lewini</i>                | JX827259                        |          |
|                          |                        | <i>Sphyrna mokarran</i>              | AF448022                        |          |
|                          | <i>Sphyrna zygaena</i> | AF448023                             |                                 |          |
| Hexanchiformes           | Chlamydoselachidae     | <i>Chlamydoselachus anguineus</i>    | AB560487                        |          |
|                          | Hexanchidae            | <i>Heptranchias perlo</i>            | AY147888                        |          |
|                          |                        | <i>Hexanchus griseus</i>             | AY147887                        |          |
|                          |                        | <i>Hexanchus nakamurai</i>           | AB560491                        |          |
| Squaliformes             | Squalidae              | <i>Notorynchus cepedianus</i>        | AB560489                        |          |
|                          |                        | <i>Cirrhigaleus australis</i>        | KJ128289                        |          |
|                          |                        | <i>Squalus acanthia</i>              | Y18134                          |          |
|                          |                        | <i>Squalus megalops</i>              | GU130625                        |          |
|                          | Centrophoridae         | <i>Centrophorus granulosus</i>       | AY147884                        |          |
|                          |                        | <i>Centrophorus squamosus</i>        | GU130628                        |          |
|                          |                        | <i>Deania calcea</i>                 | GU130626                        |          |
|                          | Etmopteridae           | <i>Aculeola nigra</i>                | GU130605                        |          |

|                    |                 |                                      |          |
|--------------------|-----------------|--------------------------------------|----------|
|                    |                 | <i>Centroscyllum fabricii</i>        | GU130634 |
|                    |                 | <i>Centroscyllum granulatum</i>      | GU130635 |
|                    |                 | <i>Centroscyllum nigrum</i>          | GU130632 |
|                    |                 | <i>Centroscyllum ritteri</i>         | GU130633 |
|                    |                 | <i>Etmopterus baxteri</i>            | GU130661 |
|                    |                 | <i>Etmopterus bigelowi</i>           | GU130617 |
|                    |                 | <i>Etmopterus brachyurus</i>         | GU130643 |
|                    |                 | <i>Etmopterus cf. decacuspидatus</i> | GU130611 |
|                    |                 | <i>Etmopterus cf. granulatus</i>     | GU130658 |
|                    |                 | <i>Etmopterus cf. molleri</i>        | GU130612 |
|                    |                 | <i>Etmopterus dianthus</i>           | GU130620 |
|                    |                 | <i>Etmopterus dislineatus</i>        | GU130608 |
|                    |                 | <i>Etmopterus fusus</i>              | GU130614 |
|                    |                 | <i>Etmopterus gracilispinis</i>      | GU130651 |
|                    |                 | <i>Etmopterus granulatus</i>         | GU130606 |
|                    |                 | <i>Etmopterus lucifer</i>            | GU130609 |
|                    |                 | <i>Etmopterus molleri</i>            | GU130637 |
|                    |                 | <i>Etmopterus polli</i>              | GU130669 |
|                    |                 | <i>Etmopterus princeps</i>           | GU130654 |
|                    |                 | <i>Etmopterus pseudosqualiolus</i>   | GU130613 |
|                    |                 | <i>Etmopterus pusillus</i>           | GU130615 |
|                    |                 | <i>Etmopterus schultzi</i>           | GU130646 |
|                    |                 | <i>Etmopterus sentosus</i>           | GU130647 |
|                    |                 | <i>Etmopterus sheikoi</i>            | GU130607 |
|                    |                 | <i>Etmopterus sp. B</i>              | GU130619 |
|                    |                 | <i>Etmopterus spinax</i>             | GU130618 |
|                    |                 | <i>Etmopterus unicolor</i>           | GU130666 |
|                    |                 | <i>Etmopterus virens</i>             | GU130670 |
|                    |                 | <i>Trigonognathus kabeyai</i>        | GU130629 |
|                    | Somniosidae     | <i>Centrosymnus owstoni</i>          | GU130622 |
|                    |                 | <i>Centroselachus crepidater</i>     | GU130621 |
|                    |                 | <i>Proscymnodon plunketi</i>         | GU130623 |
|                    |                 | <i>Scymnodon ringens</i>             | GU130624 |
|                    |                 | <i>Somniosus microcephalus</i>       | GU130604 |
|                    |                 | <i>Somniosus pacificus</i>           | AB560492 |
|                    | Oxynotidae      | <i>Oxynotus paradoxus</i>            | GU130601 |
|                    | Dalatiidae      | <i>Dalatias licha</i>                | GU130603 |
|                    |                 | <i>Squaliolus alia</i>               | GU130602 |
| Squatiniiformes    | Squatinaidae    | <i>Squatina californica</i>          | AY147886 |
|                    |                 | <i>Squatina japonica</i>             | KJ619663 |
|                    |                 | <i>Squatina nebulosa</i>             | AF448031 |
| Pristiophoriformes | Pristiophoridae | <i>Pristiophorus japonicus</i>       | AB721306 |
|                    |                 | <i>Pristiophorus nudipinnis</i>      | AY147885 |
| Torpediniiformes   | Torpedinidae    | <i>Torpedo marmorata</i>             | EF100173 |
|                    |                 | <i>Torpedo tokionis</i>              | AF448026 |
|                    | Narcinidae      | <i>Narcine timlei</i>                | AF448002 |
| Pristiformes       | Pristidae       | <i>Anoxypristis cuspidata</i>        | AF447988 |
|                    |                 | <i>Pristis clavata</i>               | KF381507 |
| Rajiformes         | Rhinidae        | <i>Rhina ancylostoma</i>             | AF448013 |
|                    | Rhynchobatidae  | <i>Rhynchobatus djiddensis</i>       | AF448020 |
|                    | Rhinobatidae    | <i>Rhinobatos cemiculus</i>          | EF100174 |
|                    |                 | <i>Rhinobatos formosensis</i>        | AF448014 |
|                    |                 | <i>Rhinobatos hynnicephalus</i>      | AF448015 |
|                    |                 | <i>Rhinobatos schlegelii</i>         | AF448016 |
|                    | Rajidae         | <i>Amblyraja hyperborea</i>          | EF100184 |
|                    |                 | <i>Dipturus batis</i>                | EF081271 |
|                    |                 | <i>Dipturus kwangtungensis</i>       | KF318309 |

|                 |                |                                  |          |
|-----------------|----------------|----------------------------------|----------|
|                 |                | <i>Dipturus nidarosiensis</i>    | EF081266 |
|                 |                | <i>Dipturus oxyrinchus</i>       | EF081269 |
|                 |                | <i>Dipturus tenuis</i>           | EF081265 |
|                 |                | <i>Hongo koreana</i>             | KC914433 |
|                 |                | <i>Leucoraja erinacea</i>        | JQ034406 |
|                 |                | <i>Leucoraja fullonica</i>       | EF100179 |
|                 |                | <i>Leucoraja naevus</i>          | EF100181 |
|                 |                | <i>Malacoraja kreffti</i>        | EF081262 |
|                 |                | <i>Neoraja caerulea</i>          | EF100178 |
|                 |                | <i>Okamejei acutispina</i>       | EF100189 |
|                 |                | <i>Raja acutispina</i>           | AF448009 |
|                 |                | <i>Raja brachyura</i>            | EF081263 |
|                 |                | <i>Raja clavata</i>              | EF100186 |
|                 |                | <i>Raja fyllae</i>               | EF100182 |
|                 |                | <i>Raja kukujevi</i>             | EF100183 |
|                 |                | <i>Raja kwangtungensis</i>       | AF448010 |
|                 |                | <i>Raja macrocauda</i>           | AF448011 |
|                 |                | <i>Raja microocellata</i>        | EF081264 |
|                 |                | <i>Raja montagui</i>             | EF100188 |
|                 |                | <i>Raja polystigma</i>           | EF100185 |
|                 |                | <i>Raja porosa</i>               | AY525783 |
|                 |                | <i>Raja radiata</i>              | AF106038 |
|                 |                | <i>Raja rhina</i>                | KC914434 |
|                 |                | <i>Raja undulata</i>             | EF100187 |
|                 |                | <i>Rostroraja alba</i>           | EF081261 |
|                 |                | <i>Zearaja chilensis</i>         | KF648508 |
| Myliobatiformes | Platyrrhinidae | <i>Platyrrhina sinensis</i>      | AF448004 |
|                 | Hexatrygonidae | <i>Plesiobatis daviesi</i>       | AF448005 |
|                 | Urolophidae    | <i>Urobatis jamaicensis</i>      | AY147898 |
|                 | Dasyatidae     | <i>Dasyatis akajei</i>           | KC526959 |
|                 |                | <i>Dasyatis bennetti</i>         | KC196067 |
|                 |                | <i>Dasyatis kuhlii</i>           | AF447991 |
|                 |                | <i>Dasyatis</i> sp. KCCL         | AF447992 |
|                 |                | <i>Dasyatis thetidis</i>         | AF447993 |
|                 |                | <i>Dasyatis zugei</i>            | JX524174 |
|                 |                | <i>Himantura gerrardi</i>        | AF447996 |
|                 |                | <i>Himantura granulata</i>       | KF751650 |
|                 |                | <i>Himantura uarnak</i>          | AF447997 |
|                 |                | <i>Neotrygon kuhlii</i>          | KC992792 |
|                 |                | <i>Pastinachus atrus</i>         | HG942172 |
|                 |                | <i>Pteroplatytrygon violacea</i> | KJ641617 |
|                 |                | <i>Taeniura lymma</i>            | AF448024 |
|                 |                | <i>Taeniura melanospilos</i>     | AF448025 |
|                 |                | <i>Taeniura meyeri</i>           | JX827260 |
|                 |                | <i>Urogymnus asperrimus</i>      | AF448027 |
|                 | Gymnuridae     | <i>Aetoplatea zonura</i>         | AF447986 |
|                 |                | <i>Gymnura poecilura</i>         | KJ617038 |
|                 | Myliobatidae   | <i>Aetobatus flagellum</i>       | KF482070 |
|                 |                | <i>Manta birostris</i>           | AF448000 |
|                 |                | <i>Mobula formosana</i>          | AF448001 |
|                 |                | <i>Mobula japonica</i>           | JX392983 |
|                 |                | <i>Rhinoptera javanica</i>       | AF448019 |

Table S3.

A list of fish species used for constructing the custom database for taxonomic assignment using BLAST including 648 sequences from 594 species placed in 36 orders, 162 families and 390 genera.

| Order                         | Family                            | Species                             | Accession No. |
|-------------------------------|-----------------------------------|-------------------------------------|---------------|
| Petromyzontiformes            | Petromyzontidae                   | <i>Lethenteron reissneri</i>        | AB969938      |
|                               |                                   | <i>Lethenteron reissneri</i>        | AB969939      |
| Chimaeriformes                | Rhinochimaeridae                  | <i>Rhinochimaera africana</i>       | AB938083      |
| Heterodontiformes             | Heterodontidae                    | <i>Heterodontus japonicus</i>       | AB938085      |
| Orectolobiformes              | Orectolobidae                     | <i>Orectolobus japonicus</i>        | AB938086      |
|                               | Rhincodontidae                    | <i>Rhincodon typus</i>              | AB938087      |
| Lamniformes                   | Odontaspidae                      | <i>Odontaspis ferox</i>             | AB938088      |
|                               | Megachasmidae                     | <i>Megachasma pelagios</i>          | AB969940      |
|                               | Alopiidae                         | <i>Alopias pelagicus</i>            | AB938089      |
|                               | Cetorhinidae                      | <i>Cetorhinus maximus</i>           | AB974447      |
| Carcharhiniformes             | Lamnidae                          | <i>Isurus oxyrinchus</i>            | AB938090      |
|                               | Scyliorhinidae                    | <i>Scyliorhinus torazame</i>        | AB974448      |
|                               |                                   | <i>Cephaloscyllium umbratile</i>    | AB974452      |
|                               |                                   | <i>Apristurus macrorhynchus</i>     | AB974449      |
|                               |                                   | <i>Galeus sauteri</i>               | AB974450      |
|                               |                                   | <i>Parmaturus pilosus</i>           | AB974451      |
|                               |                                   | <i>Proscyllium venustum</i>         | AB974453      |
|                               |                                   | <i>Hemitriakis complicofasciata</i> | AB938091      |
|                               |                                   | <i>Mustelus griseus</i>             | AB974600      |
|                               |                                   | <i>Carcharhinus albimarginatus</i>  | AB938093      |
|                               |                                   | <i>Carcharhinus brachyurus</i>      | AB938094      |
|                               | <i>Carcharhinus brevipinna</i>    | AB938095                            |               |
|                               | <i>Carcharhinus dussumieri</i>    | AB938096                            |               |
|                               | <i>Carcharhinus falciformis</i>   | AB938097                            |               |
|                               | <i>Carcharhinus leucas</i>        | AB938098                            |               |
|                               | <i>Carcharhinus limbatus</i>      | AB938099                            |               |
|                               | <i>Carcharhinus obscurus</i>      | AB938100                            |               |
|                               | <i>Carcharhinus plumbeus</i>      | AB938101                            |               |
|                               | <i>Galeocerdo cuvier</i>          | AB938102                            |               |
|                               | <i>Negaprion acutidens</i>        | AB969868                            |               |
| <i>Prionace glauca</i>        | AB938103                          |                                     |               |
| <i>Triaenodon obesus</i>      | AB938105                          |                                     |               |
| <i>Carcharodon carcharias</i> | AB974599                          |                                     |               |
| Sphyrnidae                    | <i>Sphyrna zygaena</i>            | AB938104                            |               |
|                               | <i>Sphyrna lewini</i>             | AB974454                            |               |
|                               | <i>Chlamydoselachus anguineus</i> | AB974455                            |               |
| Hexanchiformes                | Chlamydoselachidae                |                                     |               |
| Hexanchidae                   | <i>Hexanchus nakamurai</i>        | AB938106                            |               |
|                               | <i>Notorynchus cepedianus</i>     | AB938107                            |               |
|                               | <i>Heptranchias perlo</i>         | AB974456                            |               |
|                               | <i>Squalus japonicus</i>          | AB974457                            |               |
| Squaliformes                  | Squalidae                         | <i>Squaliolus aliae</i>             | AB974458      |
|                               |                                   | <i>Centrophorus atromarginatus</i>  | AB969869      |
|                               | Centrophoridae                    | <i>Centrophorus tessellatus</i>     | AB974459      |
|                               |                                   | <i>Centrophorus moluccensis</i>     | AB974460      |
|                               |                                   | <i>Etmopterus brachyurus</i>        | AB938109      |
|                               | Etmopteridae                      | <i>Etmopterus lucifer</i>           | AB969870      |
|                               |                                   | <i>Etmopterus molleri</i>           | AB974461      |
|                               |                                   | <i>Etmopterus bigelowi</i>          | AB974462      |
|                               |                                   | <i>Zameus ichiharai</i>             | AB970002      |
|                               | Somniosidae                       | <i>Centroscyrnus owstoni</i>        | AB974463      |
| <i>Squatina japonica</i>      |                                   | AB938110                            |               |
| Squatiniiformes               | Squatinae                         |                                     |               |

|                 |                |                                        |          |
|-----------------|----------------|----------------------------------------|----------|
| Torpediniformes | Narcinidae     | <i>Narcine lingula</i>                 | AB970003 |
|                 | Narkidae       | <i>Narke japonica</i>                  | AB969941 |
| Rajiformes      | Rhinobatidae   | <i>Rhina ancylostoma</i>               | AB938113 |
|                 |                | <i>Rhynchobatus djiddensis</i>         | AB938114 |
|                 | Rajidae        | <i>Dipturus macrocauda</i>             | AB938115 |
|                 |                | <i>Okamejei hollandi</i>               | AB969980 |
|                 |                | <i>Raja pulchra</i>                    | AB938116 |
| Myliobatiformes | Hexatrygonidae | <i>Hexatrygon bickelli</i>             | AB969942 |
|                 | Plesiobatidae  | <i>Plesiobatis daviesi</i>             | AB938117 |
|                 | Urolophidae    | <i>Urolophus aurantiacus</i>           | AB938118 |
|                 |                | <i>Urolophus aurantiacus</i>           | AB938119 |
|                 | Dasyatidae     | <i>Dasyatis matsubarai</i>             | AB938120 |
|                 |                | <i>Dasyatis ushieii</i>                | AB938121 |
|                 |                | <i>Himantura uarnak</i>                | AB938122 |
|                 |                | <i>Neotrygon kuhlii</i>                | AB974464 |
|                 |                | <i>Urogymnus asperrimus</i>            | AB938123 |
|                 |                | <i>Himantura uarnak</i>                | AB974465 |
|                 |                | <i>Dasyatis akajei</i>                 | AB974466 |
|                 |                | <i>Pteroplatytrygon violacea</i>       | AB974467 |
|                 |                | <i>Dasyatis ushieii</i>                | AB974598 |
|                 | Gymnuridae     | <i>Gymnura japonica</i>                | AB938124 |
|                 |                | <i>Gymnura japonica</i>                | AB974468 |
|                 | Myliobatidae   | <i>Aetobatus flagellum</i>             | AB938125 |
|                 |                | <i>Aetobatus narinari</i>              | AB938126 |
|                 |                | <i>Manta alfredi</i>                   | AB938127 |
|                 |                | <i>Mobula japonica</i>                 | AB938128 |
|                 |                | <i>Mobula tarapacana</i>               | AB938129 |
|                 |                | <i>Mobula thurstoni</i>                | AB938130 |
|                 |                | <i>Mobula thurstoni</i>                | AB974469 |
|                 |                | <i>Myliobatis tobijei</i>              | AB938131 |
|                 |                | <i>Manta birostris</i>                 | AB974470 |
| Elopiformes     | Elopidae       | <i>Elops hawaiiensis</i>               | AB974471 |
| Albuliformes    | Albulidae      | <i>Pterothrissus gissu</i>             | AB974472 |
|                 |                | <i>Albula forsteri</i>                 | AB974597 |
|                 | Notacanthidae  | <i>Notacanthus chemnitzii</i>          | AB974473 |
| Anguilliformes  | Muraenidae     | <i>Strophidon sathete</i>              | AB969837 |
|                 |                | <i>Gymnothorax flavimarginatus</i>     | AB974474 |
|                 |                | <i>Enchelycore pardalis</i>            | AB969836 |
|                 |                | <i>Strophidon sathete</i>              | AB969838 |
|                 |                | <i>Gymnothorax niphostigmus</i>        | AB974475 |
|                 | Ophichthidae   | <i>Ophisurus macrorhynchus</i>         | AB969839 |
|                 |                | <i>Ophichthus urolophus</i>            | AB974476 |
|                 |                | <i>Pisodonophis cancrivorus</i>        | AB974477 |
|                 | Congridae      | <i>Conger japonicus</i>                | AB974480 |
|                 |                | <i>Macrocephenchelys brevirostris</i>  | AB974479 |
|                 |                | <i>Uroconger lepturus</i>              | AB974478 |
| Clupeiformes    | Clupeidae      | <i>Sardinella melanura</i>             | AB974481 |
| Cypriniformes   | Cyprinidae     | <i>Tribolodon brandtii</i>             | AP011418 |
|                 |                | <i>Carassius auratus grandoculis</i>   | AP011239 |
|                 |                | <i>Tanakia tanago</i>                  | AP012526 |
|                 |                | <i>Squalidus gracilis gracilis</i>     | AP011393 |
|                 |                | <i>Rhynchocypris oxycephalus jouyi</i> | AP011269 |
|                 |                | <i>Tribolodon sachalinensis</i>        | AP011270 |
|                 |                | <i>Phoxinus phoxinus sachalinensis</i> | AP011271 |
|                 |                | <i>Zacco platypus</i>                  | AP012115 |
|                 |                | <i>Nipponocypris temminckii</i>        | AP012116 |
|                 |                | <i>Carassius cuvieri</i>               | AP011237 |

|                  |                   |                                        |          |
|------------------|-------------------|----------------------------------------|----------|
|                  |                   | <i>Pseudogobio esocinus</i>            | AP011256 |
|                  | Cobitidae         | <i>Cobitis takatsuensis</i>            | AP011290 |
|                  |                   | <i>Misgurnus anguillicaudatus</i>      | AP011291 |
|                  |                   | <i>Paramisgurnus dabryanus</i>         | AP012124 |
|                  |                   | <i>Cobitis</i> sp. BIWAE type B        | AP011344 |
|                  | Balitoridae       | <i>Lefua nikkonis</i>                  | AP011300 |
| Siluriformes     | Plotosidae        | <i>Plotosus japonicus</i>              | AB974592 |
| Argentiniiformes | Bathylagidae      | <i>Leuroglossus schmidti</i>           | AB969999 |
|                  |                   | <i>Nansenia sanrikuensis</i>           | AB970000 |
| Stomiiformes     | Phosichthyidae    | <i>Polymetme elongatus</i>             | AB969851 |
|                  |                   | <i>Woodsia nonsuchae</i>               | AB969852 |
| Ateleopodiformes | Ateleopodidae     | <i>Guentherus katoi</i>                | AB974482 |
| Aulopiformes     | Aulopidae         | <i>Hime japonica</i>                   | AB969854 |
|                  | Synodontidae      | <i>Harpadon nehereus</i>               | AB970004 |
|                  |                   | <i>Saurida wanieso</i>                 | AB938168 |
|                  |                   | <i>Saurida wanieso</i>                 | AB938169 |
|                  |                   | <i>Synodus dermatogenys</i>            | AB969855 |
|                  |                   | <i>Synodus doaki</i>                   | AB969856 |
|                  |                   | <i>Trachinocephalus myops</i>          | AB974483 |
|                  | Chlorophthalmidae | <i>Chlorophthalmus nigromarginatus</i> | AB974484 |
| Myctophiformes   | Neoscopelidae     | <i>Neoscopelus microchir</i>           | AB969857 |
|                  | Myctophidae       | <i>Nannobranchium regale</i>           | AB974485 |
|                  |                   | <i>Benthoosema pterotum</i>            | AB974486 |
|                  |                   | <i>Diaphus suborbitalis</i>            | AB974487 |
| Lampriformes     | Veliferidae       | <i>Metavelifer multiradiatus</i>       | AB938171 |
|                  |                   | <i>Velifer hypselopterus</i>           | AB969943 |
|                  | Lampridae         | <i>Lampris guttatus</i>                | AB969858 |
|                  | Lophotidae        | <i>Lophotus capellei</i>               | AB969859 |
|                  | Trachipteridae    | <i>Desmodema polystictum</i>           | AB969965 |
|                  |                   | <i>Trachipterus ishikawae</i>          | AB938163 |
|                  |                   | <i>Zu cristatus</i>                    | AB969860 |
|                  | Regalecidae       | <i>Regalecus russelii</i>              | AB969944 |
|                  |                   | <i>Regalecus russelii</i>              | AB938164 |
| Gadiformes       | Macrouridae       | <i>Coelorinchus jordani</i>            | AB969945 |
|                  |                   | <i>Coelorinchus smithi</i>             | AB969862 |
|                  |                   | <i>Coelorinchus hubbsi</i>             | AB969946 |
|                  |                   | <i>Coryphaenoides marginatus</i>       | AB969947 |
|                  |                   | <i>Coryphaenoides microps</i>          | AB970005 |
|                  |                   | <i>Hymenocephalus gracilis</i>         | AB969863 |
|                  |                   | <i>Hymenocephalus striatissimus</i>    | AB969864 |
|                  |                   | <i>Ventrifossa garmani</i>             | AB969866 |
|                  |                   | <i>Coelorinchus formosanus</i>         | AB974488 |
|                  |                   | <i>Ventrifossa rhipidodorsalis</i>     | AB974489 |
|                  |                   | <i>Coelorinchus anatirostris</i>       | AB974490 |
|                  |                   | <i>Ventrifossa garmani</i>             | AB974491 |
|                  |                   | <i>Ventrifossa garmani</i>             | AB974492 |
|                  |                   | <i>Lucigadus nigromarginatus</i>       | AB974493 |
|                  | Moridae           | <i>Laemonema modestum</i>              | AB969948 |
|                  |                   | <i>Laemonema modestum</i>              | AB969949 |
|                  |                   | <i>Lotella tosaensis</i>               | AB974494 |
|                  |                   | <i>Gadella jordani</i>                 | AB974495 |
|                  |                   | <i>Physiculus japonicus</i>            | AB974496 |
|                  | Lotidae           | <i>Ciliata mustela</i>                 | AB969950 |
|                  |                   | <i>Gaidropsarus argentatus</i>         | AB969951 |
| Ophidiiformes    | Parabrotulidae    | <i>Parabrotula tanseimaru</i>          | AB974497 |
| Lophiiformes     | Lophiidae         | <i>Lophiomus setigerus</i>             | AB969873 |
|                  |                   | <i>Lophius litulon</i>                 | AB974498 |

|                   |                 |                                                 |          |
|-------------------|-----------------|-------------------------------------------------|----------|
|                   | Ogcocephalidae  | <i>Halieutaea fumosa</i>                        | AB969875 |
|                   |                 | <i>Halieutaea</i> sp.                           | AB969876 |
|                   |                 | <i>Malthopsis annulifera</i>                    | AB969877 |
| Atheriniiformes   | Atherinidae     | <i>Iso flosmaris</i>                            | AB974499 |
| Beloniiformes     | Exocoetidae     | <i>Cypselurus doederleini</i>                   | AB974501 |
|                   |                 | <i>Oxyporhamphus similis</i>                    | AB972266 |
|                   | Belonidae       | <i>Tylosurus crocodilus crocodilus</i>          | AB974500 |
| Beryciformes      | Anomalopidae    | <i>Anomalops</i> sp.                            | AB974584 |
|                   | Monocentridae   | <i>Monocentris japonicus</i>                    | AB969881 |
|                   |                 | <i>Monocentris japonicus</i>                    | AB974588 |
|                   | Trachichthyidae | <i>Paratrachichthys prosthemius</i>             | AB974502 |
|                   |                 | <i>Gephyroberyx japonicus</i>                   | AB974503 |
|                   |                 | <i>Hoplostethus japonicus</i>                   | AB974504 |
|                   |                 | <i>Hoplostethus</i> sp. cf. <i>crassispinus</i> | AB974586 |
|                   | Holocentridae   | <i>Neoniphon sammara</i>                        | AB974505 |
|                   |                 | <i>Neoniphon sammara</i>                        | AB974506 |
|                   |                 | <i>Ostichthys japonicus</i>                     | AB969883 |
|                   |                 | <i>Sargocentron punctatissimum</i>              | AB969884 |
|                   |                 | <i>Sargocentron rubrum</i>                      | AB974507 |
|                   |                 | <i>Myripristis greenfieldi</i>                  | AB974508 |
| Zeiformes         | Parazenidae     | <i>Parazen pacificus</i>                        | AB974509 |
| Gasterosteiformes | Fistulariidae   | <i>Fistularia petimba</i>                       | AB974649 |
|                   |                 | <i>Fistularia commersonii</i>                   | AB974594 |
| Scorpaeniformes   | Dactylopteridae | <i>Dactyloptena peterseni</i>                   | AB969961 |
|                   |                 | <i>Dactylopterus volitans</i>                   | AB972264 |
|                   | Scorpaenidae    | <i>Apistus carinatus</i>                        | AB974510 |
|                   |                 | <i>Pterois lunulata</i>                         | AB969960 |
|                   |                 | <i>Sebastes thompsoni</i>                       | AB969889 |
|                   |                 | <i>Sebastes trivittatus</i>                     | AB969890 |
|                   |                 | <i>Sebastes ventricosus</i>                     | AB969891 |
|                   |                 | <i>Sebastiscus marmoratus</i>                   | AB969894 |
|                   |                 | <i>Sebastiscus tertius</i>                      | AB969892 |
|                   |                 | <i>Setarches guentheri</i>                      | AB969893 |
|                   |                 | <i>Sebastolobus macrochir</i>                   | AB972263 |
|                   |                 | <i>Dendrochirus brachypterus</i>                | AB974512 |
|                   |                 | <i>Sebastiscus albofasciatus</i>                | AB974513 |
|                   |                 | <i>Apistus carinatus</i>                        | AB974511 |
|                   |                 | <i>Pterois volitans</i>                         | AB974514 |
|                   | Tetrarogidae    | <i>Tetraroge barbata</i>                        | AB974687 |
|                   | Synanceiidae    | <i>Inimicus japonicus</i>                       | AB969887 |
|                   | Triglidae       | <i>Chelidonichthys spinosus</i>                 | AB974515 |
|                   |                 | <i>Chelidonichthys spinosus</i>                 | AB974516 |
|                   |                 | <i>Pterygotrigla multipunctata</i>              | AB974517 |
|                   |                 | <i>Lepidotrigla abyssalis</i>                   | AB974518 |
|                   |                 | <i>Lepidotrigla kishinouyei</i>                 | AB974519 |
|                   |                 | <i>Lepidotrigla</i> sp.                         | AB974520 |
|                   | Peristediidae   | <i>Peristedion nierstraszi</i>                  | AB969897 |
|                   |                 | <i>Peristedion orientale</i>                    | AB969895 |
|                   |                 | <i>Peristedion orientale</i>                    | AB969896 |
|                   |                 | <i>Scalicus amiscus</i>                         | AB972262 |
|                   |                 | <i>Scalicus engyceros</i>                       | AB972261 |
|                   |                 | <i>Satyrichthys isokawae</i>                    | AB974521 |
|                   | Bembridae       | <i>Bembras japonica</i>                         | AB969899 |
|                   |                 | <i>Bembras japonica</i>                         | AB969900 |
|                   | Platycephalidae | <i>Cociella crocodila</i>                       | AB969901 |
|                   |                 | <i>Cociella crocodila</i>                       | AB969902 |
|                   |                 | <i>Cociella</i> sp.                             | AB969903 |

|             |                 |                                     |          |
|-------------|-----------------|-------------------------------------|----------|
|             | Hoplichthyidae  | <i>Hoplichthys gilberti</i>         | AB972259 |
|             |                 | <i>Hoplichthys gilberti</i>         | AB972260 |
|             | Hexagrammidae   | <i>Hexagrammos agrammus</i>         | AB969905 |
|             |                 | <i>Hexagrammos otakii</i>           | AB969906 |
|             |                 | <i>Pleurogrammus azonus</i>         | AB969907 |
|             | Cottidae        | <i>Alcichthys elongatus</i>         | AB972258 |
|             |                 | <i>Alcichthys elongatus</i>         | AB969952 |
|             |                 | <i>Pseudoblennius percooides</i>    | AB969908 |
|             |                 | <i>Stlengis misakia</i>             | AB938166 |
|             | Hemitripterae   | <i>Hemitripterus villosus</i>       | AB969910 |
|             | Psychrolutidae  | <i>Ebinania brephocephala</i>       | AB974522 |
|             | Cyclopteridae   | <i>Aptocyclus ventricosus</i>       | AB969911 |
|             | Liparidae       | <i>Careproctus</i> sp.              | AB974682 |
|             |                 | <i>Liparis tanakae</i>              | AB974683 |
|             |                 | <i>Liparis tessellatus</i>          | AB974684 |
| Perciformes | Acropomatidae   | <i>Neoscombrops pacificus</i>       | AB974574 |
|             |                 | <i>Doederleinia berycoides</i>      | AB974523 |
|             |                 | <i>Acropoma japonicum</i>           | AB974524 |
|             | Serranidae      | <i>Caprodon schlegelii</i>          | AB974525 |
|             |                 | <i>Cephalopholis aurantia</i>       | AB974527 |
|             |                 | <i>Cephalopholis urodeta</i>        | AB974528 |
|             |                 | <i>Chelidoperca hirundinacea</i>    | AB969977 |
|             |                 | <i>Chelidoperca pleurospilus</i>    | AB969978 |
|             |                 | <i>Epinephelus amblycephalus</i>    | AB972257 |
|             |                 | <i>Epinephelus awoara</i>           | AB972256 |
|             |                 | <i>Epinephelus fasciatus</i>        | AB972255 |
|             |                 | <i>Epinephelus lanceolatus</i>      | AB938132 |
|             |                 | <i>Epinephelus latifasciatus</i>    | AB972254 |
|             |                 | <i>Epinephelus maculatus</i>        | AB972253 |
|             |                 | <i>Epinephelus merra</i>            | AB972251 |
|             |                 | <i>Epinephelus retouti</i>          | AB972252 |
|             |                 | <i>Odontanthias borbonius</i>       | AB974530 |
|             |                 | <i>Hyporthodus octofasciatus</i>    | AB972250 |
|             |                 | <i>Liopropoma erythraeum</i>        | AB974534 |
|             |                 | <i>Plectranthias yamakawai</i>      | AB974536 |
|             |                 | <i>Selenanthias analis</i>          | AB974650 |
|             |                 | <i>Odontanthias unimaculatus</i>    | AB974532 |
|             |                 | <i>Niphon spinosus</i>              | AB972249 |
|             |                 | <i>Odontanthias rhodopeplus</i>     | AB974533 |
|             |                 | <i>Liopropoma aragai</i>            | AB974535 |
|             |                 | <i>Hyporthodus octofasciatus</i>    | AB974538 |
|             |                 | <i>Stereolepis doederleini</i>      | AB974539 |
|             |                 | <i>Diploprion bifasciatum</i>       | AB974540 |
|             |                 | <i>Cephalopholis urodeta</i>        | AB974529 |
|             |                 | <i>Caprodon schlegelii</i>          | AB974526 |
|             |                 | <i>Odontanthias borbonius</i>       | AB974531 |
|             |                 | <i>Plectranthias yamakawai</i>      | AB974537 |
|             |                 | <i>Aulacocephalus temmincki</i>     | AB974589 |
|             |                 | <i>Pseudanthias squamipinnis</i>    | AB974652 |
|             | Callanthiidae   | <i>Grammatonotus surugaensis</i>    | AB974651 |
|             | Opistognathidae | <i>Opistognathus decorus</i>        | AB974587 |
|             | Banjosidae      | <i>Banjos banjos</i>                | AB974541 |
|             | Priacanthidae   | <i>Cookeolus japonicus</i>          | AB972247 |
|             |                 | <i>Heteropriacanthus cruentatus</i> | AB972245 |
|             |                 | <i>Heteropriacanthus cruentatus</i> | AB972246 |
|             |                 | <i>Priacanthus macracanthus</i>     | AB972244 |
|             |                 | <i>Priacanthus sagittarius</i>      | AB972243 |

|                 |                                     |          |
|-----------------|-------------------------------------|----------|
| Apogonidae      | <i>Ostorhinchus franssedai</i>      | AB972241 |
|                 | <i>Ostorhinchus notatus</i>         | AB972240 |
|                 | <i>Ostorhinchus doederleini</i>     | AB972239 |
| Malacanthidae   | <i>Malacanthus brevirostris</i>     | AB972238 |
|                 | <i>Branchiostegus japonicus</i>     | AB972237 |
|                 | <i>Branchiostegus auratus</i>       | AB972236 |
| Coryphaenidae   | <i>Coryphaena hippurus</i>          | AB938133 |
| Rachycentridae  | <i>Rachycentron canadum</i>         | AB972181 |
| Echeneidae      | <i>Echeneis naucrates</i>           | AB969989 |
|                 | <i>Phtheirichthys lineatus</i>      | AB938134 |
|                 | <i>Phtheirichthys lineatus</i>      | AB938135 |
|                 | <i>Remora remora</i>                | AB938136 |
|                 | <i>Remorina albescens</i>           | AB974542 |
|                 | <i>Echeneis naucrates</i>           | AB974595 |
| Carangidae      | <i>Alectis ciliaris</i>             | AB938139 |
|                 | <i>Carangoides ferdau</i>           | AB969992 |
|                 | <i>Carangoides orthogrammus</i>     | AB938141 |
|                 | <i>Caranx ignobilis</i>             | AB938142 |
|                 | <i>Caranx melampygus</i>            | AB969991 |
|                 | <i>Caranx papuensis</i>             | AB969994 |
|                 | <i>Caranx sexfasciatus</i>          | AB969990 |
|                 | <i>Decapterus macrosoma</i>         | AB969924 |
|                 | <i>Decapterus maruadsi</i>          | AB969925 |
|                 | <i>Decapterus muroadsi</i>          | AB969927 |
|                 | <i>Decapterus tabl</i>              | AB969926 |
|                 | <i>Elagatis bipinnulata</i>         | AB969993 |
|                 | <i>Gnathanodon speciosus</i>        | AB969998 |
|                 | <i>Carangoides equula</i>           | AB974543 |
|                 | <i>Pseudocaranx dentex</i>          | AB969997 |
|                 | <i>Scomberoides lysan</i>           | AB938137 |
|                 | <i>Selene vomer</i>                 | AB938140 |
|                 | <i>Seriola dumerili</i>             | AB969928 |
|                 | <i>Seriola rivoliana</i>            | AB938138 |
|                 | <i>Trachurus japonicus</i>          | AB972182 |
|                 | <i>Uraspis helvola</i>              | AB969955 |
|                 | <i>Carangoides dinema</i>           | AB969995 |
|                 | <i>Seriolina nigrofasciata</i>      | AB972178 |
|                 | <i>Naucrates ductor</i>             | AB972179 |
|                 | <i>Megalaspis cordyla</i>           | AB972223 |
|                 | <i>Carangoides caeruleopinnatus</i> | AB974544 |
|                 | <i>Carangoides caeruleopinnatus</i> | AB974545 |
|                 | <i>Trachinotus blochii</i>          | AB974596 |
| Menidae         | <i>Mene maculata</i>                | AB974593 |
| Leiognathidae   | <i>Nuchequula nuchalis</i>          | AB974546 |
| Bramidae        | <i>Pterycombus petersii</i>         | AB938174 |
|                 | <i>Taractes rubescens</i>           | AB972180 |
|                 | <i>Eumegistus illustris</i>         | AB972222 |
| Emmelichthyidae | <i>Emmelichthys struhsakeri</i>     | AB972221 |
|                 | <i>Erythrocles schlegelii</i>       | AB972220 |
| Lutjanidae      | <i>Aphareus furca</i>               | AB974573 |
|                 | <i>Etelis coruscans</i>             | AB969963 |
|                 | <i>Etelis radiosus</i>              | AB969964 |
|                 | <i>Lutjanus bohar</i>               | AB938144 |
|                 | <i>Lutjanus bohar</i>               | AB938145 |
|                 | <i>Lutjanus decussatus</i>          | AB938147 |
|                 | <i>Lutjanus fulvus</i>              | AB974575 |
|                 | <i>Lutjanus ophuysenii</i>          | AB972219 |

|                |                                       |          |
|----------------|---------------------------------------|----------|
|                | <i>Lutjanus russellii</i>             | AB969971 |
|                | <i>Lutjanus russellii</i>             | AB969970 |
|                | <i>Lutjanus sebae</i>                 | AB974547 |
|                | <i>Lutjanus stellatus</i>             | AB972218 |
|                | <i>Macolor macularis</i>              | AB974548 |
|                | <i>Paracaesio sordida</i>             | AB969973 |
|                | <i>Paracaesio sordida</i>             | AB969972 |
|                | <i>Pristipomoides auricilla</i>       | AB969966 |
|                | <i>Pristipomoides sieboldii</i>       | AB969967 |
|                | <i>Pristipomoides zonatus</i>         | AB969968 |
|                | <i>Randallichthys filamentosus</i>    | AB974644 |
|                | <i>Paracaesio caerulea</i>            | AB974645 |
|                | <i>Lutjanus monostigma</i>            | AB972217 |
|                | <i>Pristipomoides sieboldii</i>       | AB972216 |
|                | <i>Lutjanus fulviflamma</i>           | AB972215 |
|                | <i>Paracaesio stonei</i>              | AB974646 |
|                | <i>Aphareus rutilans</i>              | AB974647 |
|                | <i>Pristipomoides flavipinnis</i>     | AB974549 |
|                | <i>Pristipomoides argyrogrammicus</i> | AB974550 |
| Caesionidae    | <i>Caesio caeruleaurea</i>            | AB969996 |
|                | <i>Caesio cuning</i>                  | AB938148 |
|                | <i>Caesio teres</i>                   | AB969981 |
|                | <i>Pterocaesio digramma</i>           | AB938149 |
|                | <i>Pterocaesio marri</i>              | AB938150 |
|                | <i>Pterocaesio tile</i>               | AB969982 |
| Gerreidae      | <i>Gerres oyena</i>                   | AB974551 |
|                | <i>Gerres macracanthus</i>            | AB974601 |
| Haemulidae     | <i>Plectorhinchus cinctus</i>         | AB969919 |
|                | <i>Plectorhinchus lineatus</i>        | AB969920 |
|                | <i>Plectorhinchus schotaf</i>         | AB969921 |
| Hapalogenyidae | <i>Hapalogenys analis</i>             | AB969922 |
|                | <i>Hapalogenys kishinouyei</i>        | AB969953 |
|                | <i>Hapalogenys nigripinnis</i>        | AB969923 |
|                | <i>Hapalogenys analis</i>             | AB974552 |
| Nemipteridae   | <i>Nemipterus zysron</i>              | AB972210 |
|                | <i>Parascolopsis inermis</i>          | AB974553 |
|                | <i>Parascolopsis eriomma</i>          | AB974554 |
|                | <i>Pentapodus nagasakiensis</i>       | AB974555 |
|                | <i>Pentapodus aureofasciatus</i>      | AB974556 |
| Lethrinidae    | <i>Gnathodentex aureolineatus</i>     | AB974557 |
|                | <i>Gymnocranius euanus</i>            | AB969985 |
|                | <i>Gymnocranius grandoculis</i>       | AB969983 |
|                | <i>Gymnocranius lethrinoides</i>      | AB969984 |
|                | <i>Lethrinus genivittatus</i>         | AB938152 |
|                | <i>Lethrinus haematopterus</i>        | AB969969 |
|                | <i>Lethrinus microdon</i>             | AB969987 |
|                | <i>Lethrinus nebulosus</i>            | AB969986 |
|                | <i>Lethrinus nebulosus</i>            | AB938153 |
|                | <i>Lethrinus olivaceus</i>            | AB969988 |
|                | <i>Lethrinus rubrioperculatus</i>     | AB938154 |
|                | <i>Wattsia mossambica</i>             | AB972212 |
|                | <i>Lethrinus semicinctus</i>          | AB972234 |
|                | <i>Lethrinus genivittatus</i>         | AB974591 |
| Sparidae       | <i>Acanthopagrus latus</i>            | AB972185 |
|                | <i>Acanthopagrus sivicolus</i>        | AB972183 |
|                | <i>Dentex abei</i>                    | AB972209 |
|                | <i>Rhabdosargus sarba</i>             | AB972208 |

|                  |                                        |          |
|------------------|----------------------------------------|----------|
|                  | <i>Acanthopagrus sivicolus</i>         | AB972184 |
|                  | <i>Dentex tumifrons</i>                | AB972235 |
|                  | <i>Dentex hypselosomus</i>             | AB974558 |
| Polynemidae      | <i>Polydactylus plebeius</i>           | AB972207 |
| Sciaenidae       | <i>Larimichthy crocea</i>              | AB972205 |
|                  | <i>Pennahia argentata</i>              | AB969962 |
|                  | <i>Nibea mitsukurii</i>                | AB972233 |
| Mullidae         | <i>Parupeneus multifasciatus</i>       | AB972203 |
|                  | <i>Upeneus japonicus</i>               | AB972201 |
|                  | <i>Upeneus japonicus</i>               | AB972202 |
|                  | <i>Upeneus subvittatus</i>             | AB972200 |
|                  | <i>Parupeneus pleurostigma</i>         | AB974559 |
|                  | <i>Parupeneus ciliatus</i>             | AB974581 |
| Kyphosidae       | <i>Kyphosus cinerascens</i>            | AB972197 |
| Girellidae       | <i>Girella punctata</i>                | AB972232 |
| Microcanthidae   | <i>Microcanthus strigatus</i>          | AB972198 |
| Chaetodontidae   | <i>Chaetodon daedalma</i>              | AB969959 |
|                  | <i>Chaetodon nippon</i>                | AB972195 |
|                  | <i>Forcipiger flavissimus</i>          | AB969979 |
|                  | <i>Roa modesta</i>                     | AB974560 |
| Pomacanthidae    | <i>Apolemichthys trimaculatus</i>      | AB972199 |
|                  | <i>Chaetodontoplus septentrionalis</i> | AB972194 |
|                  | <i>Genicanthus bellus</i>              | AB974590 |
| Pentacerotidae   | <i>Evistias acutirostris</i>           | AB972193 |
|                  | <i>Pentaceros japonicus</i>            | AB974643 |
| Terapontidae     | <i>Rhyncopelates oxyrhynchus</i>       | AB972231 |
| Kuhliidae        | <i>Kuhlia rupestris</i>                | AB972190 |
| Cheilodactylidae | <i>Cheilodactylus quadricornis</i>     | AB938159 |
|                  | <i>Cheilodactylus zebra</i>            | AB938160 |
| Cepolidae        | <i>Acanthocepola indica</i>            | AB969935 |
|                  | <i>Acanthocepola krusensternii</i>     | AB969937 |
|                  | <i>Acanthocepola limbata</i>           | AB969936 |
|                  | <i>Owstonia grammodon</i>              | AB969934 |
|                  | <i>Owstonia tosaensis</i>              | AB972188 |
| Embiotocidae     | <i>Ditrema temminckii temminckii</i>   | AB969917 |
|                  | <i>Neoditrema ransonneti</i>           | AB969916 |
| Pomacentridae    | <i>Abudefduf vaigiensis</i>            | AB969974 |
|                  | <i>Chromis mirationis</i>              | AB974585 |
|                  | <i>Amphiprion clarkii</i>              | AB969975 |
|                  | <i>Chromis flavomaculata</i>           | AB969958 |
|                  | <i>Chromis flavomaculata</i>           | AB969957 |
|                  | <i>Chromis notatus notatus</i>         | AB969956 |
|                  | <i>Dascyllus trimaculatus</i>          | AB972177 |
|                  | <i>Pomacentrus taeniometopon</i>       | AB972176 |
| Labridae         | <i>Anampses meleagrides</i>            | AB974608 |
|                  | <i>Bodianus leucostictus</i>           | AB974606 |
|                  | <i>Bodianus oxycephalus</i>            | AB974605 |
|                  | <i>Cheilinus lunulatus</i>             | AB972175 |
|                  | <i>Cheilio inermis</i>                 | AB972173 |
|                  | <i>Coris dorsomacula</i>               | AB972172 |
|                  | <i>Coris picta</i>                     | AB972171 |
|                  | <i>Halichoeres tenuispinis</i>         | AB972170 |
|                  | <i>Hologymnosus doliatus</i>           | AB972169 |
|                  | <i>Iniistius twistii</i>               | AB972166 |
|                  | <i>Labroides dimidiatus</i>            | AB972165 |
|                  | <i>Novaculops woodi</i>                | AB972164 |
|                  | <i>Oxycheilinus bimaculatus</i>        | AB972163 |

|               |                                      |          |
|---------------|--------------------------------------|----------|
|               | <i>Oxycheilinus bimaculatus</i>      | AB972162 |
|               | <i>Oxycheilinus unifasciatus</i>     | AB972161 |
|               | <i>Parajulis poecilepterus</i>       | AB972160 |
|               | <i>Pseudolabrus sieboldi</i>         | AB972159 |
|               | <i>Pteragogus aurigarius</i>         | AB972158 |
|               | <i>Pteragogus aurigarius</i>         | AB972157 |
|               | <i>Pteragogus aurigarius</i>         | AB972156 |
|               | <i>Stethojulis interrupta terina</i> | AB972155 |
|               | <i>Thalassoma hardwicke</i>          | AB972154 |
|               | <i>Iniistius pavo</i>                | AB972153 |
|               | <i>Iniistius pavo</i>                | AB972152 |
|               | <i>Cheilinus undulatus</i>           | AB972168 |
|               | <i>Choerodon robustus</i>            | AB972167 |
|               | <i>Novaculichthys taeniourus</i>     | AB974609 |
|               | <i>Bodianus bilunulatus</i>          | AB974607 |
|               | <i>Oxycheilinus diagrammus</i>       | AB974610 |
|               | <i>Semicossyphus reticulatus</i>     | AB974611 |
|               | <i>Coris aygula</i>                  | AB974580 |
|               | <i>Oxycheilinus orientalis</i>       | AB974612 |
|               | <i>Thalassoma lutescens</i>          | AB974583 |
|               | <i>Choerodon fasciatus</i>           | AB974613 |
| Scaridae      | <i>Chlorurus frontalis</i>           | AB972151 |
|               | <i>Chlorurus microrhinos</i>         | AB972150 |
|               | <i>Hipposcarus longiceps</i>         | AB972149 |
|               | <i>Scarus dimidiatus</i>             | AB972148 |
|               | <i>Scarus globiceps</i>              | AB972147 |
|               | <i>Scarus niger</i>                  | AB972146 |
|               | <i>Scarus prasiognathos</i>          | AB974579 |
|               | <i>Chlorurus japonensis</i>          | AB974602 |
|               | <i>Scarus ghobban</i>                | AB974603 |
|               | <i>Calotomus carolinus</i>           | AB974604 |
|               | <i>Scarus festivus</i>               | AB974614 |
|               | <i>Chlorurus sordidus</i>            | AB974615 |
|               | <i>Scarus forsteni</i>               | AB974616 |
|               | <i>Chlorurus frontalis</i>           | AB974582 |
|               | <i>Scarus rubroviolaceus</i>         | AB974618 |
|               | <i>Scarus forsteni</i>               | AB974617 |
|               | <i>Scarus chameleon</i>              | AB974619 |
|               | <i>Chlorurus oedema</i>              | AB974620 |
|               | <i>Scarus quoyi</i>                  | AB974576 |
|               | <i>Scarus fuscocaudalis</i>          | AB974577 |
|               | <i>Scarus prasiognathos</i>          | AB974578 |
|               | <i>Scarus schlegeli</i>              | AB974621 |
|               | <i>Scarus psittacus</i>              | AB974622 |
|               | <i>Scarus spinus</i>                 | AB974623 |
|               | <i>Chlorurus bowersi</i>             | AB974624 |
| Stichaeidae   | <i>Lumpenella longirostris</i>       | AB974572 |
| Pholidae      | <i>Pholis nebulosa</i>               | AB972144 |
| Ephippidae    | <i>Chaetodipterus faber</i>          | AB969912 |
| Pinguipedidae | <i>Parapercis kamoharai</i>          | AB974625 |
|               | <i>Parapercis pacifica</i>           | AB974626 |
|               | <i>Parapercis tetracantha</i>        | AB974627 |
|               | <i>Pinguipes chilensis</i>           | AB974628 |
|               | <i>Parapercis sexfasciata</i>        | AB974629 |
| Percophidae   | <i>Acanthaphritis unoorum</i>        | AB972143 |
| Uranoscopidae | <i>Uranoscopus chinensis</i>         | AB974630 |
|               | <i>Uranoscopus japonicus</i>         | AB974631 |

|                             |                                         |          |
|-----------------------------|-----------------------------------------|----------|
| Blenniidae                  | <i>Istiblennius edentulus</i>           | AB969914 |
|                             | <i>Petroscirtes breviceps</i>           | AB969915 |
|                             | <i>Salarias fasciatus</i>               | AB974632 |
|                             | <i>Petroscirtes breviceps</i>           | AB974633 |
|                             | <i>Omobranchus punctatus</i>            | AB974635 |
| Callionymidae               | <i>Petroscirtes breviceps</i>           | AB974634 |
|                             | <i>Calliurichthys japonicus</i>         | AB970001 |
| Eleotridae                  | <i>Ophieleotris</i> sp.                 | AB974563 |
|                             | <i>Ophiocara porocephala</i>            | AB974564 |
| Gobiidae                    | <i>Pterogobius virgo</i>                | AB972141 |
|                             | <i>Cabillus</i> sp. <i>Domori</i>       | AB972139 |
|                             | <i>Cabillus lacertops</i>               | AB972138 |
|                             | <i>Cabillus tongarevae</i>              | AB972137 |
|                             | <i>Priolepis akihitoi</i>               | AB972136 |
|                             | <i>Priolepis borea</i>                  | AB972135 |
|                             | <i>Priolepis cincta</i>                 | AB972134 |
|                             | <i>Priolepis fallacineta</i>            | AB972133 |
|                             | <i>Priolepis inhaca</i>                 | AB972132 |
|                             | <i>Priolepis_latifascima</i>            | AB972131 |
|                             | <i>Priolepis semidoliata</i>            | AB972130 |
|                             | <i>Priolepis</i> sp. <i>Tsuchi-hama</i> | AB972129 |
|                             | <i>Bathygobius fuscus</i>               | AB972128 |
|                             | <i>Sicyopterus japonicus</i>            | AB974561 |
|                             | <i>Stenogobius</i> sp.                  | AB974562 |
|                             | <i>Periophthalmus argentilineatus</i>   | AB974565 |
|                             | <i>Callogobius tanegasimae</i>          | AB974566 |
|                             | <i>Exyrias puntang</i>                  | AB974567 |
|                             | <i>Psammogobius biocellatus</i>         | AB974568 |
|                             | <i>Glossogobius olivaceus</i>           | AB974636 |
|                             | <i>Yongeichthys criniger</i>            | AB974569 |
|                             | <i>Trimma macrophthalma</i>             | AB974653 |
|                             | <i>Trimma annosum</i>                   | AB974654 |
|                             | <i>Trimma caesiura</i>                  | AB974655 |
|                             | <i>Trimma cana</i>                      | AB974656 |
|                             | <i>Trimma cana</i>                      | AB974657 |
|                             | <i>Trimma emeryi</i>                    | AB974658 |
|                             | <i>Trimma flavatrum</i>                 | AB974659 |
|                             | <i>Trimma grammistes</i>                | AB974660 |
|                             | <i>Trimma hayashii</i>                  | AB974661 |
|                             | <i>Trimma kudoii</i>                    | AB974662 |
|                             | <i>Trimma marinae</i>                   | AB974663 |
|                             | <i>Trimma milta</i>                     | AB974664 |
|                             | <i>Trimma naudei</i>                    | AB974665 |
|                             | <i>Trimma okinawae</i>                  | AB974666 |
|                             | <i>Trimma rubromaculatum</i>            | AB974667 |
|                             | <i>Trimma sheppardi</i>                 | AB974668 |
|                             | <i>Trimma</i> sp.                       | AB974669 |
|                             | <i>Trimma taylori</i>                   | AB974670 |
|                             | <i>Trimma tevegae</i>                   | AB974671 |
|                             | <i>Trimma yanagitai</i>                 | AB974672 |
|                             | <i>Favonigobius reichei</i>             | AB974685 |
| <i>Redigobius bikolanus</i> | AB974686                                |          |
| Ephippidae                  | <i>Platax orbicularis</i>               | AB972127 |
| Siganidae                   | <i>Siganus guttatus</i>                 | AB972126 |
|                             | <i>Siganus fuscescens</i>               | AB974570 |
| Zanclidae                   | <i>Zanclus cornutus</i>                 | AB974571 |
| Acanthuridae                | <i>Acanthurus achilles</i>              | AB972125 |

|                   |                                    |          |
|-------------------|------------------------------------|----------|
|                   | <i>Acanthurus blochii</i>          | AB972124 |
|                   | <i>Acanthurus dussumieri</i>       | AB972123 |
|                   | <i>Acanthurus lineatus</i>         | AB972122 |
|                   | <i>Acanthurus nigricauda</i>       | AB972121 |
|                   | <i>Acanthurus nigrofuscus</i>      | AB972120 |
|                   | <i>Acanthurus olivaceus</i>        | AB972119 |
|                   | <i>Ctenochaetus striatus</i>       | AB972118 |
|                   | <i>Naso hexacanthus</i>            | AB938155 |
|                   | <i>Prionurus scalprum</i>          | AB972117 |
|                   | <i>Naso maculatus</i>              | AB972116 |
| Gempylidae        | <i>Ruvettus pretiosus</i>          | AB972230 |
| Trichiuridae      | <i>Evoxymetopon macrophthalmus</i> | AB969931 |
|                   | <i>Lepidopus caudatus</i>          | AB938176 |
|                   | <i>Tentoriceps cristatus</i>       | AB938177 |
|                   | <i>Trichiurus</i> sp. 1            | AB938178 |
|                   | <i>Trichiurus japonicus</i>        | AB972229 |
|                   | <i>Trichiurus</i> sp. 2            | AB938179 |
| Scombridae        | <i>Euthynnus affinis</i>           | AB938158 |
|                   | <i>Grammatorcynus bilineatus</i>   | AB938157 |
|                   | <i>Rastrelliger kanagurta</i>      | AB938156 |
|                   | <i>Scomber japonicus</i>           | AB972113 |
| Istiophoridae     | <i>Kajikia audax</i>               | AB972112 |
|                   | <i>Istiophorus platypterus</i>     | AB974637 |
| Centrolophidae    | <i>Hyperoglyphe antarctica</i>     | AB938180 |
|                   | <i>Hyperoglyphe japonica</i>       | AB972111 |
|                   | <i>Schedophilus velaini</i>        | AB969932 |
| Nomeidae          | <i>Cubiceps baxteri</i>            | AB938181 |
|                   | <i>Cubiceps squamiceps</i>         | AB938182 |
|                   | <i>Psenes arafurensis</i>          | AB938183 |
|                   | <i>Psenes pellucidus</i>           | AB972110 |
|                   | <i>Psenes pellucidus</i>           | AB972109 |
| Tetragonuridae    | <i>Tetragonurus pacificus</i>      | AB938184 |
| Caproidae         | <i>Antigonia rubescens</i>         | AB972106 |
|                   | <i>Antigonia capros</i>            | AB974638 |
|                   | <i>Antigonia capros</i>            | AB974639 |
| Pleuronectiformes | <i>Citharoides macrolepidotus</i>  | AB972105 |
|                   | <i>Paralichthys olivaceus</i>      | AB972103 |
|                   | <i>Pseudorhombus oligodon</i>      | AB972096 |
| Pleuronectidae    | <i>Eopsetta grigorjewi</i>         | AB972102 |
|                   | <i>Microstomus achne</i>           | AB972100 |
|                   | <i>Platichthys stellatus</i>       | AB972099 |
|                   | <i>Pleuronectes punctatissimus</i> | AB972098 |
|                   | <i>Pleuronichthys cornutus</i>     | AB972097 |
|                   | <i>Tanakius kitaharae</i>          | AB972095 |
|                   | <i>Hippoglossoides dubius</i>      | AB972228 |
|                   | <i>Hippoglossoides pinetorum</i>   | AB972227 |
|                   | <i>Dexistes rikuzenius</i>         | AB974640 |
|                   | <i>Poecilopsetta plinthus</i>      | AB974641 |
|                   | <i>Microstomus achne</i>           | AB972101 |
| Bothidae          | <i>Engyprosopon grandisquama</i>   | AB972226 |
| Soleidae          | <i>Aseraggodes kobensis</i>        | AB972094 |
|                   | <i>Heteromycteris japonicus</i>    | AB972093 |
|                   | <i>Pseudaesopia japonica</i>       | AB972092 |
|                   | <i>Zebrias zebrinus</i>            | AB972091 |
|                   | <i>Aesopia cornuta</i>             | AB972090 |
|                   | <i>Zebrias zebrinus</i>            | AB974674 |
|                   | <i>Pardachirus pavoninus</i>       | AB972225 |

|                   |                               |                                  |          |
|-------------------|-------------------------------|----------------------------------|----------|
| Tetraodontiformes | Cynoglossidae                 | <i>Cynoglossus abbreviatus</i>   | AB972089 |
|                   |                               | <i>Cynoglossus itinus</i>        | AB972087 |
|                   |                               | <i>Cynoglossus interruptus</i>   | AB972086 |
|                   |                               | <i>Cynoglossus nigropinnatus</i> | AB972224 |
|                   |                               | <i>Cynoglossus robustus</i>      | AB974673 |
|                   | Triacanthodidae               | <i>Triacanthodes anomalus</i>    | AB972085 |
|                   | Balistidae                    | <i>Sufflamen fraenatum</i>       | AB972084 |
|                   |                               | <i>Rhinecanthus aculeatus</i>    | AB974675 |
|                   | Monacanthidae                 | <i>Thamnaconus hypargyreus</i>   | AB972082 |
|                   |                               | <i>Thamnaconus tessellatus</i>   | AB972081 |
|                   |                               | <i>Thamnaconus modestoides</i>   | AB972080 |
|                   |                               | <i>Aluterus monoceros</i>        | AB974676 |
|                   |                               | <i>Rudarius ercodes</i>          | AB974677 |
|                   |                               | <i>Stephanolepis cirrhifer</i>   | AB974678 |
|                   | Ostraciidae                   | <i>Lactoria diaphana</i>         | AB972079 |
|                   |                               | <i>Ostracion immaculatus</i>     | AB972078 |
|                   |                               | <i>Tetrosomus concatenatus</i>   | AB972077 |
|                   | Tetraodontidae                | <i>Sphoeroides pachygaster</i>   | AB972075 |
|                   |                               | <i>Takifugu niphobles</i>        | AB972074 |
|                   |                               | <i>Chelonodon patoca</i>         | AB972073 |
|                   | Diodontidae                   | <i>Cylichthys spilostylus</i>    | AB972072 |
|                   |                               | <i>Diodon liturosus</i>          | AB972071 |
|                   |                               | <i>Diodon holocanthus</i>        | AB972070 |
|                   | <i>Cylichthys orbicularis</i> | AB974642                         |          |
| Molidae           | <i>Masturus lanceolatus</i>   | AB972069                         |          |
|                   | <i>Mola</i> sp.               | AB972068                         |          |
|                   | <i>Ranzania laevis</i>        | AB972067                         |          |

---
